# Supplementary material for: H2-saturation of high affinity H2-oxidizing bacteria alters the ecological niche of soil microorganisms unevenly among taxonomic groups
Source: PeerJ. 2016 Mar 10;4:e1782. doi: 10.7717/peerj.1782 (PMC4793312; doi:10.7717/peerj.1782)
Supplement: Supplemental Information 1 — All raw data utilized for this manuscript are provided as supplementary material (H2 oxidation activities, soil physicochemical properties, list of OTUs whose distribution was affected by H2 treatments). [file peerj-04-1782-s001.xlsx]

## Sheet: edgeR
Complete list of the differentially abundant OTUs identified using the likelihood ratio test implemented in the edgeR R package
OTUs	More abundant in treatment	Fold change log base 2	P-value
Archaea; ArchaeaKI; ArchaeaKI; ArchaeaKI; ArchaeaKI; ArchaeaKI4	aH2	4.42	0.0129
Archaea; ArchaeaKI; ArchaeaKI; ArchaeaKI; ArchaeaKI; ArchaeaKI5	eH2	2.67	0.0149
Archaea; Crenarchaeota; C2; C2CL; C2CL; C2CL2	aH2	4.11	0.0170
Archaea; Crenarchaeota; C2; C2CL; C2CL; C2CL3	aH2	3.73	0.0387
Archaea; Crenarchaeota; Sd-NA; NRP-J; NRP-JOR; NRP-JOR2	aH2	0.70	0.0399
Archaea; Crenarchaeota; Sd-NA; NRP-J; NRP-JOR; NRP-JOR6	aH2	1.58	0.0339
Archaea; Crenarchaeota; Sd-NA; NRP-J; NRP-JOR; NRP-JOR8	aH2	1.93	0.0432
Archaea; Crenarchaeota; Thaumarchaeota; Nitrososphaerales; Nitrososphaeraceae; Candidatus Nitrososphaera1	aH2	0.50	0.0005
Archaea; Crenarchaeota; Thaumarchaeota; Nitrososphaerales; Nitrososphaeraceae; Candidatus Nitrososphaera2	eH2	0.47	0.0031
Archaea; Euryarchaeota; Methanobacteria; Methanobacteriales; MethanobacterialesOR; MethanobacterialesOR3	eH2	4.06	0.0202
Archaea; Euryarchaeota; Methanobacteria; Methanobacteriales; MethanobacterialesOR; MethanobacterialesOR6	eH2	4.06	0.0202
Archaea; Euryarchaeota; Thermoplasmata; E2; E2OR; E2OR1	aH2	2.09	0.0241
Archaea; Euryarchaeota; Thermoplasmata; E2; WCHD3-02; WCHD3-02FA1	aH2	3.15	0.0000
Archaea; Euryarchaeota; Thermoplasmata; E2; WCHD3-02; WCHD3-02FA2	aH2	5.07	0.0019
Bacteria; ABY1_OD1; ABY1_OD1PH; ABY1_OD1PH; ABY1_OD1PH; ABY1_OD1PH1	eH2	0.94	0.0366
Bacteria; ABY1_OD1; ABY1_OD1PH; ABY1_OD1PH; ABY1_OD1PH; ABY1_OD1PH22	aH2	3.73	0.0387
Bacteria; ABY1_OD1; ABY1_OD1PH; ABY1_OD1PH; ABY1_OD1PH; ABY1_OD1PH25	eH2	4.06	0.0202
Bacteria; Acidobacteria; Acidobacteria (class); Acidobacteriales; Acidobacteriaceae; AcidobacteriaceaeFA10	eH2	1.86	0.0197
Bacteria; Acidobacteria; Acidobacteria (class); Acidobacteriales; Acidobacteriaceae; AcidobacteriaceaeFA5	eH2	0.75	0.0075
Bacteria; Acidobacteria; Acidobacteria (class); Acidobacteriales; Acidobacteriaceae; AcidobacteriaceaeFA6	aH2	1.68	0.0058
Bacteria; Acidobacteria; Acidobacteria (class); Acidobacteriales; Acidobacteriaceae; Edaphobacter2	eH2	1.32	0.0373
Bacteria; Acidobacteria; Acidobacteria (class); Acidobacteriales; AcidobacterialesOR; AcidobacterialesOR13	eH2	0.67	0.0432
Bacteria; Acidobacteria; Acidobacteria (class); Acidobacteriales; AcidobacterialesOR; AcidobacterialesOR17	eH2	0.94	0.0084
Bacteria; Acidobacteria; Acidobacteria (class); Acidobacteriales; AcidobacterialesOR; AcidobacterialesOR2	aH2	0.32	0.0229
Bacteria; Acidobacteria; Acidobacteria (class); Acidobacteriales; AcidobacterialesOR; AcidobacterialesOR24	eH2	1.04	0.0246
Bacteria; Acidobacteria; Acidobacteria (class); Acidobacteriales; AcidobacterialesOR; AcidobacterialesOR42	eH2	4.62	0.0045
Bacteria; Acidobacteria; Acidobacteria (class); Acidobacteriales; AcidobacterialesOR; AcidobacterialesOR43	aH2	1.69	0.0205
Bacteria; Acidobacteria; Acidobacteria (class); Acidobacteriales; AcidobacterialesOR; AcidobacterialesOR47	eH2	1.47	0.0488
Bacteria; Acidobacteria; Acidobacteria (class); Acidobacteriales; AcidobacterialesOR; AcidobacterialesOR58	eH2	4.62	0.0045
Bacteria; Acidobacteria; Acidobacteria-5; Acidobacteria-5CL; Acidobacteria-5CL; Acidobacteria-5CL21	eH2	4.06	0.0202
Bacteria; Acidobacteria; Acidobacteria-5; Acidobacteria-5CL; Acidobacteria-5CL; Acidobacteria-5CL3	eH2	0.38	0.0025
Bacteria; Acidobacteria; Acidobacteria-5; Acidobacteria-5CL; Acidobacteria-5CL; Acidobacteria-5CL8	eH2	1.48	0.0002
Bacteria; Acidobacteria; AcidobacteriaPH; AcidobacteriaPH; AcidobacteriaPH; AcidobacteriaPH1	aH2	0.16	0.0090
Bacteria; Acidobacteria; AcidobacteriaPH; AcidobacteriaPH; AcidobacteriaPH; AcidobacteriaPH10	aH2	0.84	0.0097
Bacteria; Acidobacteria; AcidobacteriaPH; AcidobacteriaPH; AcidobacteriaPH; AcidobacteriaPH16	aH2	1.03	0.0107
Bacteria; Acidobacteria; AcidobacteriaPH; AcidobacteriaPH; AcidobacteriaPH; AcidobacteriaPH2	aH2	0.50	0.0000
Bacteria; Acidobacteria; AcidobacteriaPH; AcidobacteriaPH; AcidobacteriaPH; AcidobacteriaPH24	aH2	0.80	0.0178
Bacteria; Acidobacteria; AcidobacteriaPH; AcidobacteriaPH; AcidobacteriaPH; AcidobacteriaPH25	aH2	0.89	0.0127
Bacteria; Acidobacteria; AcidobacteriaPH; AcidobacteriaPH; AcidobacteriaPH; AcidobacteriaPH29	aH2	0.95	0.0408
Bacteria; Acidobacteria; AcidobacteriaPH; AcidobacteriaPH; AcidobacteriaPH; AcidobacteriaPH3	aH2	0.17	0.0101
Bacteria; Acidobacteria; AcidobacteriaPH; AcidobacteriaPH; AcidobacteriaPH; AcidobacteriaPH4	aH2	0.47	0.0000
Bacteria; Acidobacteria; AcidobacteriaPH; AcidobacteriaPH; AcidobacteriaPH; AcidobacteriaPH5	aH2	0.69	0.0000
Bacteria; Acidobacteria; AcidobacteriaPH; AcidobacteriaPH; AcidobacteriaPH; AcidobacteriaPH52	eH2	1.29	0.0000
Bacteria; Acidobacteria; AcidobacteriaPH; AcidobacteriaPH; AcidobacteriaPH; AcidobacteriaPH56	aH2	1.35	0.0162
Bacteria; Acidobacteria; AcidobacteriaPH; AcidobacteriaPH; AcidobacteriaPH; AcidobacteriaPH61	eH2	1.01	0.0089
Bacteria; Acidobacteria; AcidobacteriaPH; AcidobacteriaPH; AcidobacteriaPH; AcidobacteriaPH75	aH2	4.11	0.0170
Bacteria; Acidobacteria; AcidobacteriaPH; AcidobacteriaPH; AcidobacteriaPH; AcidobacteriaPH8	aH2	0.41	0.0261
Bacteria; Acidobacteria; AcidobacteriaPH; AcidobacteriaPH; AcidobacteriaPH; AcidobacteriaPH86	aH2	3.73	0.0387
Bacteria; Acidobacteria; AcidobacteriaPH; AcidobacteriaPH; AcidobacteriaPH; AcidobacteriaPH92	eH2	4.06	0.0202
Bacteria; Acidobacteria; AcidobacteriaPH; AcidobacteriaPH; AcidobacteriaPH; AcidobacteriaPH93	aH2	3.73	0.0387
Bacteria; Acidobacteria; Chloracidobacteria; ChloracidobacteriaCL; ChloracidobacteriaCL; ChloracidobacteriaCL18	aH2	2.24	0.0170
Bacteria; Acidobacteria; Chloracidobacteria; ChloracidobacteriaCL; ChloracidobacteriaCL; ChloracidobacteriaCL35	aH2	3.73	0.0387
Bacteria; Acidobacteria; Chloracidobacteria; ChloracidobacteriaCL; ChloracidobacteriaCL; ChloracidobacteriaCL37	aH2	4.11	0.0170
Bacteria; Acidobacteria; Chloracidobacteria; ChloracidobacteriaCL; ChloracidobacteriaCL; ChloracidobacteriaCL38	eH2	4.06	0.0202
Bacteria; Acidobacteria; Chloracidobacteria; ChloracidobacteriaCL; ChloracidobacteriaCL; ChloracidobacteriaCL5	aH2	0.68	0.0116
Bacteria; Acidobacteria; Chloracidobacteria; ChloracidobacteriaCL; ChloracidobacteriaCL; ChloracidobacteriaCL7	aH2	0.57	0.0361
Bacteria; Acidobacteria; Holophagae; Holophagales; Holophagaceae; Geothrix1	aH2	0.52	0.0194
Bacteria; Acidobacteria; Holophagae; Holophagales; Holophagaceae; HolophagaceaeFA1	aH2	0.87	0.0000
Bacteria; Acidobacteria; Holophagae; Holophagales; Holophagaceae; HolophagaceaeFA3	aH2	1.99	0.0042
Bacteria; Acidobacteria; iii1-8; 32-20; 32-20OR; 32-20OR1	aH2	0.42	0.0001
Bacteria; Acidobacteria; iii1-8; 32-20; 32-20OR; 32-20OR3	aH2	0.95	0.0104
Bacteria; Acidobacteria; iii1-8; 32-20; 32-20OR; 32-20OR4	aH2	5.76	0.0000
Bacteria; Acidobacteria; iii1-8; 32-20; 32-20OR; 32-20OR5	aH2	4.88	0.0113
Bacteria; Acidobacteria; iii1-8; DS-18; DS-18OR; DS-18OR1	aH2	1.03	0.0001
Bacteria; Acidobacteria; iii1-8; DS-18; DS-18OR; DS-18OR2	aH2	1.05	0.0000
Bacteria; Acidobacteria; iii1-8; DS-18; DS-18OR; DS-18OR3	aH2	1.04	0.0329
Bacteria; Acidobacteria; iii1-8; DS-18; DS-18OR; DS-18OR5	eH2	1.56	0.0059
Bacteria; Acidobacteria; iii1-8; SJA-36; SJA-36OR; SJA-36OR6	eH2	2.27	0.0023
Bacteria; Acidobacteria; iii1-8; SJA-36; SJA-36OR; SJA-36OR7	aH2	3.73	0.0387
Bacteria; Acidobacteria; MVS-40; MVS-40CL; MVS-40CL; MVS-40CL2	eH2	4.06	0.0202
Bacteria; Acidobacteria; RB25; RB25CL; RB25CL; RB25CL1	eH2	0.23	0.0244
Bacteria; Acidobacteria; RB25; RB25CL; RB25CL; RB25CL12	eH2	1.69	0.0190
Bacteria; Acidobacteria; RB25; RB25CL; RB25CL; RB25CL17	aH2	3.73	0.0387
Bacteria; Acidobacteria; RB25; RB25CL; RB25CL; RB25CL21	eH2	4.06	0.0202
Bacteria; Acidobacteria; RB25; RB25CL; RB25CL; RB25CL7	eH2	1.49	0.0158
Bacteria; Acidobacteria; Solibacteres; Solibacterales; Solibacteraceae; Candidatus Solibacter100	aH2	1.80	0.0310
Bacteria; Acidobacteria; Solibacteres; Solibacterales; Solibacteraceae; Candidatus Solibacter111	aH2	1.75	0.0036
Bacteria; Acidobacteria; Solibacteres; Solibacterales; Solibacteraceae; Candidatus Solibacter114	aH2	5.23	0.0101
Bacteria; Acidobacteria; Solibacteres; Solibacterales; Solibacteraceae; Candidatus Solibacter116	aH2	2.37	0.0073
Bacteria; Acidobacteria; Solibacteres; Solibacterales; Solibacteraceae; Candidatus Solibacter12	aH2	0.68	0.0000
Bacteria; Acidobacteria; Solibacteres; Solibacterales; Solibacteraceae; Candidatus Solibacter120	eH2	2.97	0.0002
Bacteria; Acidobacteria; Solibacteres; Solibacterales; Solibacteraceae; Candidatus Solibacter122	aH2	4.68	0.0126
Bacteria; Acidobacteria; Solibacteres; Solibacterales; Solibacteraceae; Candidatus Solibacter125	aH2	4.89	0.0016
Bacteria; Acidobacteria; Solibacteres; Solibacterales; Solibacteraceae; Candidatus Solibacter128	aH2	4.11	0.0170
Bacteria; Acidobacteria; Solibacteres; Solibacterales; Solibacteraceae; Candidatus Solibacter135	aH2	3.73	0.0387
Bacteria; Acidobacteria; Solibacteres; Solibacterales; Solibacteraceae; Candidatus Solibacter149	aH2	3.73	0.0387
Bacteria; Acidobacteria; Solibacteres; Solibacterales; Solibacteraceae; Candidatus Solibacter151	eH2	4.06	0.0202
Bacteria; Acidobacteria; Solibacteres; Solibacterales; Solibacteraceae; Candidatus Solibacter153	eH2	4.06	0.0202
Bacteria; Acidobacteria; Solibacteres; Solibacterales; Solibacteraceae; Candidatus Solibacter155	aH2	4.11	0.0170
Bacteria; Acidobacteria; Solibacteres; Solibacterales; Solibacteraceae; Candidatus Solibacter17	aH2	0.30	0.0431
Bacteria; Acidobacteria; Solibacteres; Solibacterales; Solibacteraceae; Candidatus Solibacter26	aH2	0.52	0.0033
Bacteria; Acidobacteria; Solibacteres; Solibacterales; Solibacteraceae; Candidatus Solibacter3	aH2	0.58	0.0000
Bacteria; Acidobacteria; Solibacteres; Solibacterales; Solibacteraceae; Candidatus Solibacter31	aH2	0.51	0.0470
Bacteria; Acidobacteria; Solibacteres; Solibacterales; Solibacteraceae; Candidatus Solibacter34	aH2	0.54	0.0416
Bacteria; Acidobacteria; Solibacteres; Solibacterales; Solibacteraceae; Candidatus Solibacter35	aH2	0.91	0.0003
Bacteria; Acidobacteria; Solibacteres; Solibacterales; Solibacteraceae; Candidatus Solibacter36	aH2	0.64	0.0022
Bacteria; Acidobacteria; Solibacteres; Solibacterales; Solibacteraceae; Candidatus Solibacter4	aH2	0.59	0.0000
Bacteria; Acidobacteria; Solibacteres; Solibacterales; Solibacteraceae; Candidatus Solibacter43	eH2	0.71	0.0430
Bacteria; Acidobacteria; Solibacteres; Solibacterales; Solibacteraceae; Candidatus Solibacter45	aH2	0.64	0.0162
Bacteria; Acidobacteria; Solibacteres; Solibacterales; Solibacteraceae; Candidatus Solibacter48	aH2	0.76	0.0106
Bacteria; Acidobacteria; Solibacteres; Solibacterales; Solibacteraceae; Candidatus Solibacter53	aH2	0.71	0.0459
Bacteria; Acidobacteria; Solibacteres; Solibacterales; Solibacteraceae; Candidatus Solibacter54	eH2	0.60	0.0210
Bacteria; Acidobacteria; Solibacteres; Solibacterales; Solibacteraceae; Candidatus Solibacter57	aH2	0.71	0.0178
Bacteria; Acidobacteria; Solibacteres; Solibacterales; Solibacteraceae; Candidatus Solibacter64	eH2	1.74	0.0069
Bacteria; Acidobacteria; Solibacteres; Solibacterales; Solibacteraceae; Candidatus Solibacter68	aH2	1.99	0.0042
Bacteria; Acidobacteria; Solibacteres; Solibacterales; Solibacteraceae; Candidatus Solibacter8	aH2	0.35	0.0057
Bacteria; Acidobacteria; Solibacteres; Solibacterales; Solibacteraceae; Candidatus Solibacter94	aH2	4.89	0.0016
Bacteria; Acidobacteria; Sva0725; Sva0725; Sva0725OR; Sva0725OR13	aH2	4.11	0.0170
Bacteria; Acidobacteria; Sva0725; Sva0725; Sva0725OR; Sva0725OR4	aH2	2.38	0.0488
Bacteria; Actinobacteria; Actinobacteria (class); 0319-7L14; 0319-7L14OR; 0319-7L14OR12	eH2	1.17	0.0171
Bacteria; Actinobacteria; Actinobacteria (class); 0319-7L14; 0319-7L14OR; 0319-7L14OR17	eH2	1.47	0.0488
Bacteria; Actinobacteria; Actinobacteria (class); 0319-7L14; 0319-7L14OR; 0319-7L14OR4	eH2	0.44	0.0283
Bacteria; Actinobacteria; Actinobacteria (class); 0319-7L14; 0319-7L14OR; 0319-7L14OR5	eH2	0.48	0.0344
Bacteria; Actinobacteria; Actinobacteria (class); Acidimicrobiales; AcidimicrobialesOR; AcidimicrobialesOR12	eH2	2.14	0.0188
Bacteria; Actinobacteria; Actinobacteria (class); Acidimicrobiales; AcidimicrobialesOR; AcidimicrobialesOR4	aH2	1.17	0.0242
Bacteria; Actinobacteria; Actinobacteria (class); Acidimicrobiales; EB1017; EB1017FA2	aH2	0.46	0.0344
Bacteria; Actinobacteria; Actinobacteria (class); Acidimicrobiales; EB1017; EB1017FA20	eH2	1.47	0.0488
Bacteria; Actinobacteria; Actinobacteria (class); Acidimicrobiales; EB1017; EB1017FA3	aH2	0.51	0.0268
Bacteria; Actinobacteria; Actinobacteria (class); Acidimicrobiales; EB1017; EB1017FA6	aH2	0.67	0.0387
Bacteria; Actinobacteria; Actinobacteria (class); Acidimicrobiales; EB1017; EB1017FA9	aH2	0.84	0.0261
Bacteria; Actinobacteria; Actinobacteria (class); Acidimicrobiales; Microthrixaceae; MicrothrixaceaeFA5	eH2	2.67	0.0149
Bacteria; Actinobacteria; Actinobacteria (class); Actinobacteria (class)CL; Actinobacteria (class)CL; Actinobacteria (class)CL21	eH2	4.62	0.0045
Bacteria; Actinobacteria; Actinobacteria (class); Actinobacteria (class)CL; Actinobacteria (class)CL; Actinobacteria (class)CL4	eH2	0.72	0.0143
Bacteria; Actinobacteria; Actinobacteria (class); Actinobacteria (class)CL; Actinobacteria (class)CL; Actinobacteria (class)CL9	aH2	1.20	0.0372
Bacteria; Actinobacteria; Actinobacteria (class); Actinomycetales; ACK-M1; ACK-M1FA1	eH2	4.06	0.0202
Bacteria; Actinobacteria; Actinobacteria (class); Actinomycetales; ActinomycetalesOR; ActinomycetalesOR11	eH2	1.43	0.0141
Bacteria; Actinobacteria; Actinobacteria (class); Actinomycetales; Cellulomonadaceae; CellulomonadaceaeFA1	eH2	1.62	0.0022
Bacteria; Actinobacteria; Actinobacteria (class); Actinomycetales; Frankiaceae; FrankiaceaeFA2	aH2	0.84	0.0261
Bacteria; Actinobacteria; Actinobacteria (class); Actinomycetales; Frankiaceae; FrankiaceaeFA4	aH2	2.51	0.0001
Bacteria; Actinobacteria; Actinobacteria (class); Actinomycetales; Intrasporangiaceae; IntrasporangiaceaeFA1	eH2	0.70	0.0047
Bacteria; Actinobacteria; Actinobacteria (class); Actinomycetales; Intrasporangiaceae; Phycicoccus1	aH2	1.23	0.0088
Bacteria; Actinobacteria; Actinobacteria (class); Actinomycetales; Micrococcaceae; Arthrobacter1	aH2	2.31	0.0005
Bacteria; Actinobacteria; Actinobacteria (class); Actinomycetales; Micromonosporaceae; Actinoplanes2	eH2	1.80	0.0010
Bacteria; Actinobacteria; Actinobacteria (class); Actinomycetales; Micromonosporaceae; Catellatospora1	aH2	2.61	0.0021
Bacteria; Actinobacteria; Actinobacteria (class); Actinomycetales; Micromonosporaceae; MicromonosporaceaeFA10	eH2	4.62	0.0045
Bacteria; Actinobacteria; Actinobacteria (class); Actinomycetales; Micromonosporaceae; MicromonosporaceaeFA2	aH2	1.99	0.0042
Bacteria; Actinobacteria; Actinobacteria (class); Actinomycetales; Micromonosporaceae; MicromonosporaceaeFA7	aH2	3.73	0.0387
Bacteria; Actinobacteria; Actinobacteria (class); Actinomycetales; Micromonosporaceae1	aH2	3.73	0.0387
Bacteria; Actinobacteria; Actinobacteria (class); Actinomycetales; Nocardiaceae; NocardiaceaeFA2	aH2	4.67	0.0035
Bacteria; Actinobacteria; Actinobacteria (class); Actinomycetales; Nocardiaceae; Rhodococcus2	eH2	1.03	0.0208
Bacteria; Actinobacteria; Actinobacteria (class); Actinomycetales; Nocardioidaceae; NocardioidaceaeFA4	aH2	0.98	0.0134
Bacteria; Actinobacteria; Actinobacteria (class); Actinomycetales; Nocardioidaceae; NocardioidaceaeFA7	eH2	4.06	0.0202
Bacteria; Actinobacteria; Actinobacteria (class); Actinomycetales; Pseudonocardiaceae; Actinomycetospora1	aH2	3.73	0.0387
Bacteria; Actinobacteria; Actinobacteria (class); Actinomycetales; Streptomycetaceae; Kitasatospora1	aH2	0.67	0.0007
Bacteria; Actinobacteria; Actinobacteria (class); Actinomycetales; Streptomycetaceae; Streptomyces1	aH2	1.29	0.0015
Bacteria; Actinobacteria; Actinobacteria (class); Coriobacteriales; CoriobacterialesOR; CoriobacterialesOR3	eH2	4.06	0.0202
Bacteria; Actinobacteria; Actinobacteria (class); MC47; MC47OR; MC47OR12	eH2	1.14	0.0000
Bacteria; Actinobacteria; Actinobacteria (class); MC47; MC47OR; MC47OR40	aH2	2.09	0.0240
Bacteria; Actinobacteria; Actinobacteria (class); Solirubrobacterales; Patulibacteraceae; PatulibacteraceaeFA14	eH2	4.06	0.0202
Bacteria; Actinobacteria; Actinobacteria (class); Solirubrobacterales; Patulibacteraceae; PatulibacteraceaeFA3	eH2	1.17	0.0032
Bacteria; Actinobacteria; Actinobacteria (class); Solirubrobacterales; Patulibacteraceae; PatulibacteraceaeFA6	aH2	1.75	0.0036
Bacteria; Actinobacteria; Actinobacteria (class); Solirubrobacterales; Patulibacteraceae; PatulibacteraceaeFA9	aH2	2.50	0.0039
Bacteria; Actinobacteria; Actinobacteria (class); Solirubrobacterales; Solirubrobacteraceae; SolirubrobacteraceaeFA1	aH2	2.24	0.0133
Bacteria; Actinobacteria; Actinobacteria (class); Solirubrobacterales; SolirubrobacteralesOR; SolirubrobacteralesOR16	eH2	2.14	0.0188
Bacteria; Actinobacteria; Actinobacteria (class); Solirubrobacterales; SolirubrobacteralesOR; SolirubrobacteralesOR17	eH2	1.88	0.0071
Bacteria; Actinobacteria; Actinobacteria (class); Solirubrobacterales; SolirubrobacteralesOR; SolirubrobacteralesOR23	eH2	4.06	0.0202
Bacteria; Actinobacteria; Actinobacteria (class); Solirubrobacterales; SolirubrobacteralesOR; SolirubrobacteralesOR8	aH2	0.96	0.0176
Bacteria; AD3; ABS-6; ABS-6CL; ABS-6CL; ABS-6CL1	aH2	0.49	0.0000
Bacteria; AD3; ABS-6; ABS-6CL; ABS-6CL; ABS-6CL3	aH2	1.32	0.0022
Bacteria; AD3; JG37-AG-4; JG37-AG-4CL; JG37-AG-4CL; JG37-AG-4CL7	aH2	4.89	0.0019
Bacteria; Armatimonadetes; Armatimonadia; Armatimonadales; WD294; WD294FA4	eH2	4.06	0.0202
Bacteria; Armatimonadetes; CH21; CH21CL; CH21CL; CH21CL12	aH2	2.09	0.0241
Bacteria; Armatimonadetes; CH21; CH21CL; CH21CL; CH21CL14	aH2	5.24	0.0003
Bacteria; Armatimonadetes; CH21; CH21CL; CH21CL; CH21CL25	aH2	3.73	0.0387
Bacteria; Armatimonadetes; CH21; CH21CL; CH21CL; CH21CL28	eH2	4.62	0.0045
Bacteria; Armatimonadetes; CH21; CH21CL; CH21CL; CH21CL6	eH2	1.05	0.0348
Bacteria; Armatimonadetes; Chthonomonadetes; Chthonomonadales; Chthonomonadaceae; ChthonomonadaceaeFA12	aH2	3.73	0.0387
Bacteria; Armatimonadetes; Chthonomonadetes; Chthonomonadales; Chthonomonadaceae; ChthonomonadaceaeFA3	aH2	1.20	0.0372
Bacteria; Armatimonadetes; Chthonomonadetes; Chthonomonadales; Chthonomonadaceae; ChthonomonadaceaeFA8	aH2	4.67	0.0035
Bacteria; Armatimonadetes; S1a-1H; S1a-1HCL; S1a-1HCL; S1a-1HCL10	aH2	3.73	0.0387
Bacteria; Bacteroidetes; Bacteroidia; Bacteroidales; BacteroidalesOR; BacteroidalesOR15	eH2	4.06	0.0202
Bacteria; Bacteroidetes; Bacteroidia; Bacteroidales; Marinilabiaceae; MarinilabiaceaeFA1	aH2	4.67	0.0035
Bacteria; Bacteroidetes; Bacteroidia; Bacteroidales; Porphyromonadaceae; Candidatus Azobacteroides1	eH2	4.06	0.0202
Bacteria; Bacteroidetes; Flavobacteria; FlavobacteriaCL; FlavobacteriaCL; FlavobacteriaCL1	aH2	0.89	0.0055
Bacteria; Bacteroidetes; Flavobacteria; FlavobacteriaCL; FlavobacteriaCL; FlavobacteriaCL5	eH2	2.99	0.0042
Bacteria; Bacteroidetes; Flavobacteria; Flavobacteriales; Flavobacteriaceae; Chryseobacterium1	aH2	2.37	0.0073
Bacteria; Bacteroidetes; Flavobacteria; Flavobacteriales; Flavobacteriaceae; Flavobacterium4	aH2	1.80	0.0310
Bacteria; Bacteroidetes; Flavobacteria; Flavobacteriales; Flavobacteriaceae; Flavobacterium6	eH2	2.61	0.0019
Bacteria; Bacteroidetes; Sphingobacteria; Sphingobacteriales; Flammeovirgaceae; Sporocytophaga2	eH2	4.06	0.0202
Bacteria; Bacteroidetes; Sphingobacteria; Sphingobacteriales; Flexibacteraceae; Cytophaga11	eH2	1.04	0.0015
Bacteria; Bacteroidetes; Sphingobacteria; Sphingobacteriales; Flexibacteraceae; Cytophaga12	eH2	2.74	0.0000
Bacteria; Bacteroidetes; Sphingobacteria; Sphingobacteriales; Flexibacteraceae; Cytophaga14	eH2	0.78	0.0446
Bacteria; Bacteroidetes; Sphingobacteria; Sphingobacteriales; Flexibacteraceae; Cytophaga2	eH2	0.44	0.0000
Bacteria; Bacteroidetes; Sphingobacteria; Sphingobacteriales; Flexibacteraceae; Cytophaga21	aH2	4.89	0.0016
Bacteria; Bacteroidetes; Sphingobacteria; Sphingobacteriales; Flexibacteraceae; Cytophaga22	aH2	4.42	0.0119
Bacteria; Bacteroidetes; Sphingobacteria; Sphingobacteriales; Flexibacteraceae; Cytophaga23	eH2	1.62	0.0022
Bacteria; Bacteroidetes; Sphingobacteria; Sphingobacteriales; Flexibacteraceae; Cytophaga3	eH2	0.77	0.0000
Bacteria; Bacteroidetes; Sphingobacteria; Sphingobacteriales; Flexibacteraceae; Cytophaga34	eH2	5.59	0.0001
Bacteria; Bacteroidetes; Sphingobacteria; Sphingobacteriales; Flexibacteraceae; Cytophaga4	eH2	0.76	0.0003
Bacteria; Bacteroidetes; Sphingobacteria; Sphingobacteriales; Flexibacteraceae; Cytophaga46	eH2	4.06	0.0202
Bacteria; Bacteroidetes; Sphingobacteria; Sphingobacteriales; Flexibacteraceae; Cytophaga5	aH2	0.59	0.0384
Bacteria; Bacteroidetes; Sphingobacteria; Sphingobacteriales; Flexibacteraceae; FlexibacteraceaeFA1	aH2	0.81	0.0202
Bacteria; Bacteroidetes; Sphingobacteria; Sphingobacteriales; Flexibacteraceae; Hymenobacter2	aH2	4.11	0.0170
Bacteria; Bacteroidetes; Sphingobacteria; Sphingobacteriales; Flexibacteraceae5	eH2	4.06	0.0202
Bacteria; Bacteroidetes; Sphingobacteria; Sphingobacteriales; Saprospiraceae; SaprospiraceaeFA2	eH2	1.10	0.0076
Bacteria; Bacteroidetes; Sphingobacteria; Sphingobacteriales; Saprospiraceae; SaprospiraceaeFA3	aH2	2.99	0.0018
Bacteria; Bacteroidetes; Sphingobacteria; Sphingobacteriales; Saprospiraceae; SaprospiraceaeFA4	eH2	1.38	0.0123
Bacteria; Bacteroidetes; Sphingobacteria; Sphingobacteriales; Sphingobacteriaceae; Pedobacter1	aH2	1.60	0.0117
Bacteria; Bacteroidetes; Sphingobacteria; Sphingobacteriales; Sphingobacteriaceae; SphingobacteriaceaeFA12	eH2	4.06	0.0202
Bacteria; Bacteroidetes; Sphingobacteria; Sphingobacteriales; Sphingobacteriaceae; SphingobacteriaceaeFA5	aH2	1.47	0.0031
Bacteria; Bacteroidetes; Sphingobacteria; Sphingobacteriales; Sphingobacteriaceae; SphingobacteriaceaeFA6	aH2	0.90	0.0376
Bacteria; Bacteroidetes; Sphingobacteria; Sphingobacteriales; SphingobacterialesOR; SphingobacterialesOR102	aH2	2.37	0.0073
Bacteria; Bacteroidetes; Sphingobacteria; Sphingobacteriales; SphingobacterialesOR; SphingobacterialesOR117	eH2	2.99	0.0042
Bacteria; Bacteroidetes; Sphingobacteria; Sphingobacteriales; SphingobacterialesOR; SphingobacterialesOR123	eH2	3.65	0.0001
Bacteria; Bacteroidetes; Sphingobacteria; Sphingobacteriales; SphingobacterialesOR; SphingobacterialesOR131	eH2	2.14	0.0188
Bacteria; Bacteroidetes; Sphingobacteria; Sphingobacteriales; SphingobacterialesOR; SphingobacterialesOR133	aH2	4.89	0.0016
Bacteria; Bacteroidetes; Sphingobacteria; Sphingobacteriales; SphingobacterialesOR; SphingobacterialesOR134	aH2	5.07	0.0022
Bacteria; Bacteroidetes; Sphingobacteria; Sphingobacteriales; SphingobacterialesOR; SphingobacterialesOR135	aH2	4.42	0.0119
Bacteria; Bacteroidetes; Sphingobacteria; Sphingobacteriales; SphingobacterialesOR; SphingobacterialesOR137	eH2	1.86	0.0197
Bacteria; Bacteroidetes; Sphingobacteria; Sphingobacteriales; SphingobacterialesOR; SphingobacterialesOR139	aH2	3.73	0.0387
Bacteria; Bacteroidetes; Sphingobacteria; Sphingobacteriales; SphingobacterialesOR; SphingobacterialesOR142	eH2	2.46	0.0001
Bacteria; Bacteroidetes; Sphingobacteria; Sphingobacteriales; SphingobacterialesOR; SphingobacterialesOR153	eH2	1.47	0.0488
Bacteria; Bacteroidetes; Sphingobacteria; Sphingobacteriales; SphingobacterialesOR; SphingobacterialesOR160	aH2	3.73	0.0387
Bacteria; Bacteroidetes; Sphingobacteria; Sphingobacteriales; SphingobacterialesOR; SphingobacterialesOR163	eH2	2.67	0.0149
Bacteria; Bacteroidetes; Sphingobacteria; Sphingobacteriales; SphingobacterialesOR; SphingobacterialesOR184	eH2	5.59	0.0001
Bacteria; Bacteroidetes; Sphingobacteria; Sphingobacteriales; SphingobacterialesOR; SphingobacterialesOR189	aH2	4.11	0.0170
Bacteria; Bacteroidetes; Sphingobacteria; Sphingobacteriales; SphingobacterialesOR; SphingobacterialesOR190	aH2	4.42	0.0119
Bacteria; Bacteroidetes; Sphingobacteria; Sphingobacteriales; SphingobacterialesOR; SphingobacterialesOR197	eH2	4.06	0.0202
Bacteria; Bacteroidetes; Sphingobacteria; Sphingobacteriales; SphingobacterialesOR; SphingobacterialesOR21	eH2	0.52	0.0174
Bacteria; Bacteroidetes; Sphingobacteria; Sphingobacteriales; SphingobacterialesOR; SphingobacterialesOR215	eH2	5.02	0.0010
Bacteria; Bacteroidetes; Sphingobacteria; Sphingobacteriales; SphingobacterialesOR; SphingobacterialesOR219	aH2	3.73	0.0387
Bacteria; Bacteroidetes; Sphingobacteria; Sphingobacteriales; SphingobacterialesOR; SphingobacterialesOR230	aH2	4.11	0.0170
Bacteria; Bacteroidetes; Sphingobacteria; Sphingobacteriales; SphingobacterialesOR; SphingobacterialesOR267	eH2	4.62	0.0045
Bacteria; Bacteroidetes; Sphingobacteria; Sphingobacteriales; SphingobacterialesOR; SphingobacterialesOR27	aH2	0.88	0.0139
Bacteria; Bacteroidetes; Sphingobacteria; Sphingobacteriales; SphingobacterialesOR; SphingobacterialesOR28	eH2	1.07	0.0001
Bacteria; Bacteroidetes; Sphingobacteria; Sphingobacteriales; SphingobacterialesOR; SphingobacterialesOR3	aH2	0.65	0.0000
Bacteria; Bacteroidetes; Sphingobacteria; Sphingobacteriales; SphingobacterialesOR; SphingobacterialesOR31	aH2	0.90	0.0050
Bacteria; Bacteroidetes; Sphingobacteria; Sphingobacteriales; SphingobacterialesOR; SphingobacterialesOR36	eH2	1.17	0.0006
Bacteria; Bacteroidetes; Sphingobacteria; Sphingobacteriales; SphingobacterialesOR; SphingobacterialesOR4	aH2	0.59	0.0000
Bacteria; Bacteroidetes; Sphingobacteria; Sphingobacteriales; SphingobacterialesOR; SphingobacterialesOR51	eH2	1.01	0.0075
Bacteria; Bacteroidetes; Sphingobacteria; Sphingobacteriales; SphingobacterialesOR; SphingobacterialesOR60	eH2	1.47	0.0488
Bacteria; Bacteroidetes; Sphingobacteria; Sphingobacteriales; SphingobacterialesOR; SphingobacterialesOR65	eH2	1.51	0.0018
Bacteria; Bacteroidetes; Sphingobacteria; Sphingobacteriales; SphingobacterialesOR; SphingobacterialesOR68	eH2	1.04	0.0246
Bacteria; Bacteroidetes; Sphingobacteria; Sphingobacteriales; SphingobacterialesOR; SphingobacterialesOR73	aH2	1.72	0.0218
Bacteria; Bacteroidetes; Sphingobacteria; Sphingobacteriales; SphingobacterialesOR; SphingobacterialesOR9	eH2	0.53	0.0007
Bacteria; Bacteroidetes; Sphingobacteria; Sphingobacteriales; SphingobacterialesOR; SphingobacterialesOR92	eH2	1.32	0.0373
Bacteria; Bacteroidetes; Sphingobacteria; Sphingobacteriales; SphingobacterialesOR; SphingobacterialesOR93	eH2	1.32	0.0373
Bacteria; BRC1; BRC1PH; BRC1PH; BRC1PH; BRC1PH2	aH2	1.93	0.0432
Bacteria; Chlamydiae; Chlamydiae (class); Chlamydiales; ChlamydialesOR; ChlamydialesOR15	aH2	3.73	0.0387
Bacteria; Chlamydiae; Chlamydiae (class); Chlamydiales; ChlamydialesOR; ChlamydialesOR17	aH2	4.42	0.0119
Bacteria; Chlamydiae; Chlamydiae (class); Chlamydiales; ChlamydialesOR; ChlamydialesOR3	eH2	3.38	0.0000
Bacteria; Chlamydiae; Chlamydiae (class); Chlamydiales; ChlamydialesOR; ChlamydialesOR36	aH2	3.73	0.0387
Bacteria; Chlamydiae; Chlamydiae (class); Chlamydiales; ChlamydialesOR; ChlamydialesOR46	eH2	4.06	0.0202
Bacteria; Chlamydiae; Chlamydiae (class); Chlamydiales; ChlamydialesOR; ChlamydialesOR9	aH2	4.42	0.0076
Bacteria; Chlamydiae; Chlamydiae (class); Chlamydiales; ChlamydialesOR; ChlamydialesOR90	eH2	4.06	0.0202
Bacteria; Chlamydiae; Chlamydiae (class); Chlamydiales; Parachlamydiaceae; Candidatus Protochlamydia5	aH2	4.42	0.0076
Bacteria; Chlamydiae; Chlamydiae (class); Chlamydiales; Parachlamydiaceae; Parachlamydia1	aH2	3.73	0.0387
Bacteria; Chlamydiae; Chlamydiae (class); Chlamydiales; Parachlamydiaceae; ParachlamydiaceaeFA15	eH2	4.06	0.0202
Bacteria; Chlamydiae; Chlamydiae (class); Chlamydiales; Parachlamydiaceae; ParachlamydiaceaeFA2	aH2	4.11	0.0170
Bacteria; Chlamydiae; Chlamydiae (class); Chlamydiales; Parachlamydiaceae; ParachlamydiaceaeFA7	aH2	4.42	0.0119
Bacteria; Chlamydiae; Chlamydiae (class); Chlamydiales; Rhabdochlamydiaceae; Candidatus Rhabdochlamydia1	eH2	1.51	0.0018
Bacteria; Chlamydiae; Chlamydiae (class); Chlamydiales; Rhabdochlamydiaceae; Candidatus Rhabdochlamydia25	eH2	5.59	0.0001
Bacteria; Chlamydiae; Chlamydiae (class); Chlamydiales; Rhabdochlamydiaceae; Candidatus Rhabdochlamydia30	eH2	4.06	0.0202
Bacteria; Chlamydiae; Chlamydiae (class); Chlamydiales1	aH2	5.24	0.0003
Bacteria; Chlorobi; SJA-28; SJA-28CL; SJA-28CL; SJA-28CL5	aH2	4.42	0.0076
Bacteria; Chlorobi; SM1B09; SM1B09CL; SM1B09CL; SM1B09CL10	aH2	5.06	0.0107
Bacteria; Chlorobi; SM1B09; SM1B09CL; SM1B09CL; SM1B09CL12	aH2	4.11	0.0170
Bacteria; Chlorobi; SM1B09; SM1B09CL; SM1B09CL; SM1B09CL17	aH2	4.11	0.0170
Bacteria; Chlorobi; SM1B09; SM1B09CL; SM1B09CL; SM1B09CL2	eH2	0.80	0.0028
Bacteria; Chlorobi; SM1B09; SM1B09CL; SM1B09CL; SM1B09CL9	aH2	4.11	0.0170
Bacteria; Chloroflexi; Anaerolineae; A31; S47; S47FA2	aH2	1.05	0.0017
Bacteria; Chloroflexi; Anaerolineae; A31; S47; S47FA5	aH2	1.20	0.0372
Bacteria; Chloroflexi; Anaerolineae; A4b; A4bOR; A4bOR14	aH2	5.07	0.0007
Bacteria; Chloroflexi; Anaerolineae; A4b; A4bOR; A4bOR23	aH2	4.67	0.0035
Bacteria; Chloroflexi; Anaerolineae; A4b; A4bOR; A4bOR24	aH2	4.11	0.0170
Bacteria; Chloroflexi; Anaerolineae; A4b; A4bOR; A4bOR35	aH2	4.11	0.0170
Bacteria; Chloroflexi; Anaerolineae; A4b; A4bOR; A4bOR41	aH2	4.42	0.0076
Bacteria; Chloroflexi; Anaerolineae; A4b; A4bOR; A4bOR44	aH2	3.73	0.0387
Bacteria; Chloroflexi; Anaerolineae; A4b; A4bOR; A4bOR57	eH2	4.62	0.0045
Bacteria; Chloroflexi; Anaerolineae; A4b; A4bOR; A4bOR61	eH2	4.06	0.0202
Bacteria; Chloroflexi; Anaerolineae; A4b; A4bOR; A4bOR62	eH2	4.06	0.0202
Bacteria; Chloroflexi; Anaerolineae; A4b; A4bOR; A4bOR7	aH2	1.16	0.0335
Bacteria; Chloroflexi; Anaerolineae; A4b; A4bOR; A4bOR72	eH2	2.99	0.0042
Bacteria; Chloroflexi; Anaerolineae; Anaerolineales; Anaerolinaceae; AnaerolinaceaeFA1	eH2	1.24	0.0275
Bacteria; Chloroflexi; Anaerolineae; CFB-26; CFB-26OR; CFB-26OR11	eH2	4.62	0.0045
Bacteria; Chloroflexi; Anaerolineae; CFB-26; CFB-26OR; CFB-26OR7	eH2	2.67	0.0149
Bacteria; Chloroflexi; Anaerolineae; CFB-26; CFB-26OR; CFB-26OR8	aH2	4.67	0.0035
Bacteria; Chloroflexi; Anaerolineae; H39; H39OR; H39OR2	aH2	1.84	0.0005
Bacteria; Chloroflexi; Anaerolineae; H39; H39OR; H39OR7	aH2	3.73	0.0387
Bacteria; Chloroflexi; Anaerolineae; H39; H39OR; H39OR9	aH2	4.42	0.0129
Bacteria; Chloroflexi; Anaerolineae; WCHB1-50; WCHB1-50OR; WCHB1-50OR1	eH2	0.71	0.0139
Bacteria; Chloroflexi; Anaerolineae; WCHB1-50; WCHB1-50OR; WCHB1-50OR4	aH2	1.93	0.0432
Bacteria; Chloroflexi; Anaerolineae; WCHB1-50; WCHB1-50OR; WCHB1-50OR7	aH2	4.42	0.0076
Bacteria; Chloroflexi; Bljii12; AKYG885; 5B-12; 5B-12FA13	eH2	4.06	0.0202
Bacteria; Chloroflexi; Bljii12; AKYG885; Dolo_23; Dolo_23FA1	eH2	0.66	0.0194
Bacteria; Chloroflexi; Bljii12; AKYG885; Dolo_23; Dolo_23FA4	eH2	1.58	0.0176
Bacteria; Chloroflexi; Bljii12; B07_WMSP1; AKYH910; AKYH910FA5	eH2	4.06	0.0202
Bacteria; Chloroflexi; Bljii12; B07_WMSP1; FFCH4570; FFCH4570FA1	eH2	0.76	0.0046
Bacteria; Chloroflexi; Bljii12; B07_WMSP1; FFCH4570; FFCH4570FA5	eH2	2.05	0.0026
Bacteria; Chloroflexi; Chloroflexi (class); Chloroflexales; ChloroflexalesOR; ChloroflexalesOR2	eH2	4.06	0.0202
Bacteria; Chloroflexi; Chloroflexi (class); Roseiflexales; Kouleothrixaceae; KouleothrixaceaeFA12	aH2	3.73	0.0387
Bacteria; Chloroflexi; Chloroflexi (class); Roseiflexales; Kouleothrixaceae; KouleothrixaceaeFA2	eH2	1.24	0.0000
Bacteria; Chloroflexi; Chloroflexi (class); Roseiflexales; Kouleothrixaceae; KouleothrixaceaeFA4	eH2	1.11	0.0089
Bacteria; Chloroflexi; ChloroflexiPH; ChloroflexiPH; ChloroflexiPH; ChloroflexiPH9	eH2	4.62	0.0045
Bacteria; Chloroflexi; Dehalococcoidetes; Dehalococcoidales; Dehalococcoidaceae; DehalococcoidaceaeFA1	aH2	4.67	0.0035
Bacteria; Chloroflexi; Ktedonobacteria; KtedonobacteriaCL; KtedonobacteriaCL; KtedonobacteriaCL102	aH2	4.11	0.0170
Bacteria; Chloroflexi; Ktedonobacteria; KtedonobacteriaCL; KtedonobacteriaCL; KtedonobacteriaCL107	eH2	4.06	0.0202
Bacteria; Chloroflexi; Ktedonobacteria; KtedonobacteriaCL; KtedonobacteriaCL; KtedonobacteriaCL110	eH2	4.06	0.0202
Bacteria; Chloroflexi; Ktedonobacteria; KtedonobacteriaCL; KtedonobacteriaCL; KtedonobacteriaCL111	eH2	4.06	0.0202
Bacteria; Chloroflexi; Ktedonobacteria; KtedonobacteriaCL; KtedonobacteriaCL; KtedonobacteriaCL117	eH2	4.06	0.0202
Bacteria; Chloroflexi; Ktedonobacteria; KtedonobacteriaCL; KtedonobacteriaCL; KtedonobacteriaCL120	eH2	5.02	0.0010
Bacteria; Chloroflexi; Ktedonobacteria; KtedonobacteriaCL; KtedonobacteriaCL; KtedonobacteriaCL129	aH2	4.11	0.0170
Bacteria; Chloroflexi; Ktedonobacteria; KtedonobacteriaCL; KtedonobacteriaCL; KtedonobacteriaCL186	eH2	4.62	0.0045
Bacteria; Chloroflexi; Ktedonobacteria; KtedonobacteriaCL; KtedonobacteriaCL; KtedonobacteriaCL2	aH2	0.38	0.0022
Bacteria; Chloroflexi; Ktedonobacteria; KtedonobacteriaCL; KtedonobacteriaCL; KtedonobacteriaCL21	aH2	1.42	0.0105
Bacteria; Chloroflexi; Ktedonobacteria; KtedonobacteriaCL; KtedonobacteriaCL; KtedonobacteriaCL29	eH2	2.15	0.0003
Bacteria; Chloroflexi; Ktedonobacteria; KtedonobacteriaCL; KtedonobacteriaCL; KtedonobacteriaCL3	aH2	0.55	0.0000
Bacteria; Chloroflexi; Ktedonobacteria; KtedonobacteriaCL; KtedonobacteriaCL; KtedonobacteriaCL34	aH2	2.50	0.0039
Bacteria; Chloroflexi; Ktedonobacteria; KtedonobacteriaCL; KtedonobacteriaCL; KtedonobacteriaCL4	aH2	0.42	0.0106
Bacteria; Chloroflexi; Ktedonobacteria; KtedonobacteriaCL; KtedonobacteriaCL; KtedonobacteriaCL44	eH2	1.39	0.0430
Bacteria; Chloroflexi; Ktedonobacteria; KtedonobacteriaCL; KtedonobacteriaCL; KtedonobacteriaCL46	eH2	2.14	0.0188
Bacteria; Chloroflexi; Ktedonobacteria; KtedonobacteriaCL; KtedonobacteriaCL; KtedonobacteriaCL5	aH2	0.68	0.0000
Bacteria; Chloroflexi; Ktedonobacteria; KtedonobacteriaCL; KtedonobacteriaCL; KtedonobacteriaCL55	eH2	2.39	0.0060
Bacteria; Chloroflexi; Ktedonobacteria; KtedonobacteriaCL; KtedonobacteriaCL; KtedonobacteriaCL66	eH2	3.46	0.0003
Bacteria; Chloroflexi; Ktedonobacteria; KtedonobacteriaCL; KtedonobacteriaCL; KtedonobacteriaCL73	eH2	4.62	0.0045
Bacteria; Chloroflexi; Ktedonobacteria; KtedonobacteriaCL; KtedonobacteriaCL; KtedonobacteriaCL8	aH2	0.57	0.0195
Bacteria; Chloroflexi; Ktedonobacteria; KtedonobacteriaCL; KtedonobacteriaCL; KtedonobacteriaCL87	aH2	3.73	0.0387
Bacteria; Chloroflexi; Ktedonobacteria; KtedonobacteriaCL; KtedonobacteriaCL; KtedonobacteriaCL89	aH2	3.73	0.0387
Bacteria; Chloroflexi; Ktedonobacteria; KtedonobacteriaCL; KtedonobacteriaCL; KtedonobacteriaCL9	eH2	0.51	0.0190
Bacteria; Chloroflexi; RA13C7; RA13C7CL; RA13C7CL; RA13C7CL1	aH2	2.71	0.0045
Bacteria; Chloroflexi; SOGA31; SOGA31CL; SOGA31CL; SOGA31CL1	eH2	0.38	0.0001
Bacteria; Chloroflexi; SOGA31; SOGA31CL; SOGA31CL; SOGA31CL18	aH2	1.93	0.0432
Bacteria; Chloroflexi; SOGA31; SOGA31CL; SOGA31CL; SOGA31CL4	aH2	0.72	0.0417
Bacteria; Chloroflexi; SOGA31; SOGA31CL; SOGA31CL; SOGA31CL8	eH2	1.37	0.0037
Bacteria; Chloroflexi; Thermomicrobia; ThermomicrobiaCL; ThermomicrobiaCL; ThermomicrobiaCL1	aH2	3.73	0.0387
Bacteria; Chloroflexi; Thermomicrobia; Thermomicrobiales; ThermomicrobialesOR; ThermomicrobialesOR1	aH2	4.67	0.0035
Bacteria; Chloroflexi; TK17; mle1-48; mle1-48OR; mle1-48OR6	eH2	4.06	0.0202
Bacteria; Chloroflexi; TK17; S085; S085OR; S085OR1	eH2	0.45	0.0116
Bacteria; Chloroflexi; TK17; S085; S085OR; S085OR11	aH2	4.11	0.0170
Bacteria; Chloroflexi; TK17; S085; S085OR; S085OR5	eH2	1.69	0.0190
Bacteria; Chloroflexi1	eH2	0.87	0.0016
Bacteria; Cyanobacteria; 4C0d-2; mle1-12; mle1-12OR; mle1-12OR4	aH2	4.11	0.0170
Bacteria; Cyanobacteria; 4C0d-2; SM1D11; SM1D11OR; SM1D11OR1	aH2	1.34	0.0373
Bacteria; Cyanobacteria; 4C0d-2; SM1D11; SM1D11OR; SM1D11OR4	aH2	4.89	0.0016
Bacteria; Cyanobacteria; 4C0d-2; SM1D11; SM1D11OR; SM1D11OR8	eH2	4.06	0.0202
Bacteria; Cyanobacteria; Chloroplast; Stramenopiles; StramenopilesOR; StramenopilesOR1	aH2	0.83	0.0026
Bacteria; Cyanobacteria; Chloroplast; Stramenopiles; StramenopilesOR; StramenopilesOR11	aH2	3.73	0.0387
Bacteria; Cyanobacteria; Chloroplast; Stramenopiles; StramenopilesOR; StramenopilesOR13	eH2	2.67	0.0149
Bacteria; Cyanobacteria; Chloroplast; Stramenopiles; StramenopilesOR; StramenopilesOR3	eH2	0.99	0.0024
Bacteria; Cyanobacteria; Chloroplast; Stramenopiles; StramenopilesOR; StramenopilesOR5	eH2	1.06	0.0414
Bacteria; Cyanobacteria; Chloroplast; Stramenopiles; StramenopilesOR; StramenopilesOR6	eH2	2.17	0.0000
Bacteria; Cyanobacteria; Oscillatoriophycideae; Oscillatoriales; Phormidiaceae; Microcoleus1	aH2	1.11	0.0355
Bacteria; Cyanobacteria; Oscillatoriophycideae; Oscillatoriales; Phormidiaceae; Phormidium2	eH2	1.17	0.0171
Bacteria; Cyanobacteria; Oscillatoriophycideae; Oscillatoriales; Phormidiaceae; Phormidium3	aH2	2.24	0.0144
Bacteria; Cyanobacteria; Oscillatoriophycideae; Oscillatoriales; Phormidiaceae; Phormidium8	aH2	3.73	0.0387
Bacteria; Cyanobacteria; S15B-MN24; S15B-MN24CL; S15B-MN24CL; S15B-MN24CL8	aH2	4.11	0.0170
Bacteria; Cyanobacteria; Synechococcophycideae; Pseudanabaenales; Pseudanabaenaceae; Leptolyngbya1	aH2	1.93	0.0432
Bacteria; Cyanobacteria; Synechococcophycideae; Pseudanabaenales; Pseudanabaenaceae; Pseudanabaena1	aH2	1.40	0.0006
Bacteria; Cyanobacteria; Synechococcophycideae; Pseudanabaenales; Pseudanabaenaceae; Pseudanabaena2	aH2	1.61	0.0027
Bacteria; Cyanobacteria; Synechococcophycideae; Pseudanabaenales; Pseudanabaenaceae; Pseudanabaena3	aH2	2.50	0.0039
Bacteria; Elusimicrobia; Elusimicrobia (class); Elusimicrobiales; ElusimicrobialesOR; ElusimicrobialesOR1	aH2	1.04	0.0212
Bacteria; Elusimicrobia; Elusimicrobia (class); Elusimicrobiales; ElusimicrobialesOR; ElusimicrobialesOR17	aH2	3.73	0.0387
Bacteria; Elusimicrobia; Elusimicrobia (class); Elusimicrobiales; ElusimicrobialesOR; ElusimicrobialesOR21	eH2	2.99	0.0042
Bacteria; Elusimicrobia; Elusimicrobia (class); Elusimicrobiales; ElusimicrobialesOR; ElusimicrobialesOR26	eH2	4.06	0.0202
Bacteria; Elusimicrobia; Elusimicrobia (class); Elusimicrobiales; ElusimicrobialesOR; ElusimicrobialesOR31	aH2	3.73	0.0387
Bacteria; Elusimicrobia; Elusimicrobia (class); FAC88; FAC88OR; FAC88OR1	eH2	0.67	0.0010
Bacteria; Elusimicrobia; Elusimicrobia (class); FAC88; FAC88OR; FAC88OR20	eH2	4.06	0.0202
Bacteria; Elusimicrobia; Elusimicrobia (class); FAC88; FAC88OR; FAC88OR27	aH2	3.73	0.0387
Bacteria; Elusimicrobia; Elusimicrobia (class); FAC88; FAC88OR; FAC88OR28	eH2	4.06	0.0202
Bacteria; Elusimicrobia; Elusimicrobia (class); FAC88; FAC88OR; FAC88OR3	eH2	1.39	0.0004
Bacteria; Elusimicrobia; Elusimicrobia (class); FAC88; FAC88OR; FAC88OR41	eH2	4.06	0.0202
Bacteria; Elusimicrobia; Elusimicrobia (class); FAC88; FAC88OR; FAC88OR9	aH2	1.60	0.0094
Bacteria; Elusimicrobia; Elusimicrobia (class); MVP-88; MVP-88OR; MVP-88OR16	aH2	4.42	0.0129
Bacteria; Elusimicrobia; Elusimicrobia (class); MVP-88; MVP-88OR; MVP-88OR24	eH2	2.67	0.0149
Bacteria; Elusimicrobia; Elusimicrobia (class); MVP-88; MVP-88OR; MVP-88OR3	aH2	0.81	0.0398
Bacteria; Elusimicrobia; Elusimicrobia (class); MVP-88; MVP-88OR; MVP-88OR31	aH2	3.73	0.0387
Bacteria; Elusimicrobia; Elusimicrobia (class); MVP-88; MVP-88OR; MVP-88OR34	eH2	4.06	0.0202
Bacteria; Elusimicrobia; Elusimicrobia (class); MVP-88; MVP-88OR; MVP-88OR8	eH2	1.32	0.0373
Bacteria; Elusimicrobia; Elusimicrobia (class)2	eH2	2.67	0.0149
Bacteria; Elusimicrobia; ElusimicrobiaPH; ElusimicrobiaPH; ElusimicrobiaPH; ElusimicrobiaPH3	eH2	2.14	0.0188
Bacteria; Firmicutes; Bacilli; Bacillales; Alicyclobacillaceae; Alicyclobacillus12	eH2	4.06	0.0202
Bacteria; Firmicutes; Bacilli; Bacillales; Bacillaceae; Bacillus1	aH2	0.57	0.0193
Bacteria; Firmicutes; Bacilli; Bacillales; Bacillaceae; Bacillus9	aH2	4.11	0.0170
Bacteria; Firmicutes; Bacilli; Bacillales; Paenibacillaceae; Paenibacillus11	aH2	4.67	0.0035
Bacteria; Firmicutes; Bacilli; Bacillales; Paenibacillaceae; Paenibacillus53	eH2	4.06	0.0202
Bacteria; Firmicutes; Bacilli; Bacillales; Paenibacillaceae; Paenibacillus7	aH2	4.42	0.0076
Bacteria; Firmicutes; Clostridia; ClostridiaCL; ClostridiaCL; ClostridiaCL1	eH2	1.14	0.0123
Bacteria; Firmicutes; Clostridia; ClostridiaCL; ClostridiaCL; ClostridiaCL7	aH2	3.73	0.0387
Bacteria; Firmicutes; Clostridia; ClostridiaCL; ClostridiaCL; ClostridiaCL8	aH2	3.73	0.0387
Bacteria; Firmicutes; Clostridia; Clostridiales; Clostridiaceae; Clostridium1	aH2	0.95	0.0272
Bacteria; Firmicutes; Clostridia; Clostridiales; Clostridiaceae; Clostridium11	aH2	4.42	0.0129
Bacteria; Firmicutes; Clostridia; Clostridiales; Clostridiaceae; Clostridium22	aH2	3.73	0.0387
Bacteria; Firmicutes; Clostridia; Clostridiales; Clostridiaceae; Clostridium9	aH2	4.42	0.0076
Bacteria; Firmicutes; Clostridia; Clostridiales; Lachnospiraceae; Coprococcus2	aH2	3.73	0.0387
Bacteria; Firmicutes; Clostridia; Clostridiales; Lachnospiraceae; Epulopiscium2	eH2	4.06	0.0202
Bacteria; Firmicutes; Clostridia; Clostridiales; Peptococcaceae; Desulfitobacterium2	aH2	3.73	0.0387
Bacteria; Firmicutes; Clostridia; Clostridiales; Ruminococcaceae; Acetivibrio12	aH2	3.73	0.0387
Bacteria; Firmicutes; Clostridia; Clostridiales; Ruminococcaceae; Acetivibrio3	aH2	3.73	0.0387
Bacteria; Firmicutes; Clostridia; Clostridiales; Ruminococcaceae; Acetivibrio8	aH2	4.11	0.0170
Bacteria; Firmicutes; Clostridia; Clostridiales; Symbiobacteriaceae; SymbiobacteriaceaeFA10	aH2	3.73	0.0387
Bacteria; Firmicutes; Clostridia; Clostridiales; Symbiobacteriaceae; SymbiobacteriaceaeFA12	aH2	4.11	0.0170
Bacteria; Firmicutes; Clostridia; Clostridiales; Symbiobacteriaceae; SymbiobacteriaceaeFA23	aH2	3.73	0.0387
Bacteria; Firmicutes; Clostridia; Clostridiales; Symbiobacteriaceae; SymbiobacteriaceaeFA3	eH2	1.17	0.0171
Bacteria; Firmicutes; Clostridia; Clostridiales; Symbiobacteriaceae; SymbiobacteriaceaeFA41	eH2	4.62	0.0045
Bacteria; Firmicutes; Clostridia; Clostridiales; Symbiobacteriaceae; SymbiobacteriaceaeFA9	aH2	3.73	0.0387
Bacteria; Firmicutes; Clostridia; OPB54; OPB54OR; OPB54OR3	aH2	3.73	0.0387
Bacteria; Firmicutes; Clostridia2	aH2	1.04	0.0212
Bacteria; GAL15; GAL15PH; GAL15PH; GAL15PH; GAL15PH2	aH2	0.88	0.0438
Bacteria; GAL15; GAL15PH; GAL15PH; GAL15PH; GAL15PH4	aH2	4.11	0.0170
Bacteria; Gemmatimonadetes; Gemmatimonadetes (class); Gemmatimonadales; Gemmatimonadaceae; GemmatimonadaceaeFA12	eH2	0.97	0.0000
Bacteria; Gemmatimonadetes; Gemmatimonadetes (class); Gemmatimonadales; Gemmatimonadaceae; GemmatimonadaceaeFA13	aH2	1.22	0.0003
Bacteria; Gemmatimonadetes; Gemmatimonadetes (class); Gemmatimonadales; Gemmatimonadaceae; GemmatimonadaceaeFA16	aH2	1.23	0.0048
Bacteria; Gemmatimonadetes; Gemmatimonadetes (class); Gemmatimonadales; Gemmatimonadaceae; GemmatimonadaceaeFA2	eH2	0.36	0.0025
Bacteria; Gemmatimonadetes; Gemmatimonadetes (class); Gemmatimonadales; Gemmatimonadaceae; GemmatimonadaceaeFA24	aH2	1.11	0.0355
Bacteria; Gemmatimonadetes; Gemmatimonadetes (class); Gemmatimonadales; Gemmatimonadaceae; GemmatimonadaceaeFA25	eH2	0.88	0.0128
Bacteria; Gemmatimonadetes; Gemmatimonadetes (class); Gemmatimonadales; Gemmatimonadaceae; GemmatimonadaceaeFA26	eH2	1.09	0.0064
Bacteria; Gemmatimonadetes; Gemmatimonadetes (class); Gemmatimonadales; Gemmatimonadaceae; GemmatimonadaceaeFA44	eH2	2.27	0.0023
Bacteria; Gemmatimonadetes; Gemmatimonadetes (class); Gemmatimonadales; Gemmatimonadaceae; GemmatimonadaceaeFA47	eH2	2.80	0.0006
Bacteria; Gemmatimonadetes; Gemmatimonadetes (class); Gemmatimonadales; Gemmatimonadaceae; GemmatimonadaceaeFA53	eH2	4.06	0.0202
Bacteria; Gemmatimonadetes; Gemmatimonadetes (class); Gemmatimonadales; Gemmatimonadaceae; GemmatimonadaceaeFA54	aH2	3.73	0.0387
Bacteria; Gemmatimonadetes; Gemmatimonadetes (class); Gemmatimonadales; Gemmatimonadaceae; GemmatimonadaceaeFA7	aH2	0.42	0.0405
Bacteria; Gemmatimonadetes; Gemmatimonadetes (class); Gemmatimonadales; Gemmatimonadaceae; Gemmatimonas1	aH2	0.33	0.0004
Bacteria; Gemmatimonadetes; Gemmatimonadetes (class); Gemmatimonadales; Gemmatimonadaceae; Gemmatimonas2	aH2	0.93	0.0000
Bacteria; Gemmatimonadetes; Gemmatimonadetes (class); Gemmatimonadales; Gemmatimonadaceae; Gemmatimonas4	aH2	1.28	0.0247
Bacteria; Gemmatimonadetes; Gemmatimonadetes (class); Gemmatimonadales; Gemmatimonadaceae; Gemmatimonas8	eH2	2.14	0.0188
Bacteria; Gemmatimonadetes; Gemmatimonadetes (class); Gemmatimonadales; GemmatimonadalesOR; GemmatimonadalesOR10	aH2	0.48	0.0181
Bacteria; Gemmatimonadetes; Gemmatimonadetes (class); Gemmatimonadales; GemmatimonadalesOR; GemmatimonadalesOR12	aH2	0.93	0.0159
Bacteria; Gemmatimonadetes; Gemmatimonadetes (class); Gemmatimonadales; GemmatimonadalesOR; GemmatimonadalesOR13	aH2	0.62	0.0267
Bacteria; Gemmatimonadetes; Gemmatimonadetes (class); Gemmatimonadales; GemmatimonadalesOR; GemmatimonadalesOR3	eH2	0.29	0.0316
Bacteria; Gemmatimonadetes; Gemmatimonadetes (class); Gemmatimonadales; GemmatimonadalesOR; GemmatimonadalesOR33	eH2	4.62	0.0045
Bacteria; Gemmatimonadetes; Gemmatimonadetes (class); Gemmatimonadales; GemmatimonadalesOR; GemmatimonadalesOR35	aH2	3.73	0.0387
Bacteria; Gemmatimonadetes; Gemmatimonadetes (class); Gemmatimonadales; GemmatimonadalesOR; GemmatimonadalesOR41	eH2	4.06	0.0202
Bacteria; Gemmatimonadetes; Gemmatimonadetes (class); Gemmatimonadales; GemmatimonadalesOR; GemmatimonadalesOR5	aH2	0.45	0.0255
Bacteria; Gemmatimonadetes; Gemmatimonadetes (class); Gemmatimonadales; GemmatimonadalesOR; GemmatimonadalesOR8	aH2	0.56	0.0294
Bacteria; Gemmatimonadetes; Gemmatimonadetes (class); Gemmatimonadetes (class)CL; Gemmatimonadetes (class)CL; Gemmatimonadetes (class)CL7	aH2	4.11	0.0170
Bacteria; GN04; GN15; GN15CL; GN15CL; GN15CL1	aH2	5.08	0.0113
Bacteria; GOUTA4; RB384; RB384CL; RB384CL; RB384CL2	aH2	4.11	0.0170
Bacteria; KSB1; KSB1PH; KSB1PH; KSB1PH; KSB1PH1	eH2	1.04	0.0246
Bacteria; Nitrospirae; Nitrospira (class); Nitrospirales; Nitrospiraceae; Nitrospira1	eH2	0.42	0.0002
Bacteria; Nitrospirae; Nitrospira (class); Nitrospirales; Nitrospiraceae; Nitrospira6	eH2	1.14	0.0123
Bacteria; Nitrospirae; Nitrospira (class); Nitrospirales; Nitrospiraceae; Nitrospira8	aH2	3.73	0.0387
Bacteria; Nitrospirae; Nitrospira (class); Nitrospirales; Thermodesulfovibrionaceae; GOUTA191	aH2	1.69	0.0264
Bacteria; OP11; OP11-3; OP11-3CL; OP11-3CL; OP11-3CL21	eH2	4.62	0.0045
Bacteria; OP11; OP11-3; OP11-3CL; OP11-3CL; OP11-3CL5	eH2	4.06	0.0202
Bacteria; OP11; OP11-3; OP11-3CL; OP11-3CL; OP11-3CL9	aH2	3.73	0.0387
Bacteria; OP3; koll11; koll11CL; koll11CL; koll11CL1	eH2	1.18	0.0007
Bacteria; OP3; koll11; koll11CL; koll11CL; koll11CL12	eH2	2.67	0.0149
Bacteria; OP3; koll11; koll11CL; koll11CL; koll11CL13	aH2	4.67	0.0035
Bacteria; OP3; koll11; koll11CL; koll11CL; koll11CL19	eH2	4.06	0.0202
Bacteria; OP3; koll11; koll11CL; koll11CL; koll11CL22	eH2	4.06	0.0202
Bacteria; OP3; koll11; koll11CL; koll11CL; koll11CL3	eH2	1.19	0.0200
Bacteria; OP3; koll11; koll11CL; koll11CL; koll11CL30	eH2	5.59	0.0001
Bacteria; OP3; koll11; koll11CL; koll11CL; koll11CL32	eH2	4.06	0.0202
Bacteria; OP3; koll11; koll11CL; koll11CL; koll11CL33	eH2	4.06	0.0202
Bacteria; Planctomycetes; agg27; CL500-15; CL500-15OR; CL500-15OR7	aH2	3.73	0.0387
Bacteria; Planctomycetes; agg27; OM190; OM190OR; OM190OR16	eH2	2.67	0.0149
Bacteria; Planctomycetes; agg27; OM190; OM190OR; OM190OR4	eH2	0.86	0.0253
Bacteria; Planctomycetes; agg27; OM190; OM190OR; OM190OR5	eH2	0.74	0.0453
Bacteria; Planctomycetes; Phycisphaerae; PhycisphaeraeCL; PhycisphaeraeCL; PhycisphaeraeCL1	eH2	0.58	0.0000
Bacteria; Planctomycetes; Phycisphaerae; PhycisphaeraeCL; PhycisphaeraeCL; PhycisphaeraeCL119	aH2	3.73	0.0387
Bacteria; Planctomycetes; Phycisphaerae; PhycisphaeraeCL; PhycisphaeraeCL; PhycisphaeraeCL12	eH2	1.09	0.0055
Bacteria; Planctomycetes; Phycisphaerae; PhycisphaeraeCL; PhycisphaeraeCL; PhycisphaeraeCL2	aH2	0.64	0.0162
Bacteria; Planctomycetes; Phycisphaerae; PhycisphaeraeCL; PhycisphaeraeCL; PhycisphaeraeCL40	aH2	4.11	0.0170
Bacteria; Planctomycetes; Phycisphaerae; PhycisphaeraeCL; PhycisphaeraeCL; PhycisphaeraeCL48	eH2	4.06	0.0202
Bacteria; Planctomycetes; Phycisphaerae; PhycisphaeraeCL; PhycisphaeraeCL; PhycisphaeraeCL52	aH2	3.73	0.0387
Bacteria; Planctomycetes; Phycisphaerae; PhycisphaeraeCL; PhycisphaeraeCL; PhycisphaeraeCL62	eH2	2.67	0.0149
Bacteria; Planctomycetes; Phycisphaerae; PhycisphaeraeCL; PhycisphaeraeCL; PhycisphaeraeCL64	aH2	3.73	0.0387
Bacteria; Planctomycetes; Phycisphaerae; PhycisphaeraeCL; PhycisphaeraeCL; PhycisphaeraeCL88	eH2	4.06	0.0202
Bacteria; Planctomycetes; Phycisphaerae; PhycisphaeraeCL; PhycisphaeraeCL; PhycisphaeraeCL91	eH2	4.06	0.0202
Bacteria; Planctomycetes; Phycisphaerae; Phycisphaerales; Phycisphaeraceae; PhycisphaeraceaeFA10	eH2	4.06	0.0202
Bacteria; Planctomycetes; Phycisphaerae; Phycisphaerales; Phycisphaeraceae; PhycisphaeraceaeFA16	eH2	4.06	0.0202
Bacteria; Planctomycetes; Phycisphaerae; Phycisphaerales; Phycisphaeraceae; PhycisphaeraceaeFA5	eH2	4.62	0.0045
Bacteria; Planctomycetes; Phycisphaerae; Phycisphaerales; Phycisphaeraceae; PhycisphaeraceaeFA8	eH2	4.06	0.0202
Bacteria; Planctomycetes; Phycisphaerae; Phycisphaerales; PhycisphaeralesOR; PhycisphaeralesOR12	eH2	2.39	0.0060
Bacteria; Planctomycetes; Phycisphaerae; Phycisphaerales; PhycisphaeralesOR; PhycisphaeralesOR14	aH2	3.73	0.0387
Bacteria; Planctomycetes; Phycisphaerae; Phycisphaerales; PhycisphaeralesOR; PhycisphaeralesOR8	aH2	4.42	0.0119
Bacteria; Planctomycetes; Phycisphaerae; Phycisphaerales; PhycisphaeralesOR; PhycisphaeralesOR9	eH2	2.61	0.0019
Bacteria; Planctomycetes; Phycisphaerae; Phycisphaerales2	eH2	4.62	0.0045
Bacteria; Planctomycetes; Phycisphaerae; Phycisphaerales3	eH2	4.06	0.0202
Bacteria; Planctomycetes; Planctomycea; Gemmatales; Gemmataceae; Gemmata10	aH2	5.07	0.0007
Bacteria; Planctomycetes; Planctomycea; Gemmatales; Gemmataceae; Gemmata12	aH2	1.58	0.0339
Bacteria; Planctomycetes; Planctomycea; Gemmatales; Gemmataceae; Gemmata17	aH2	4.67	0.0035
Bacteria; Planctomycetes; Planctomycea; Gemmatales; Gemmataceae; Gemmata22	aH2	1.93	0.0432
Bacteria; Planctomycetes; Planctomycea; Gemmatales; Gemmataceae; Gemmata31	aH2	4.42	0.0119
Bacteria; Planctomycetes; Planctomycea; Gemmatales; Gemmataceae; Gemmata5	aH2	1.69	0.0264
Bacteria; Planctomycetes; Planctomycea; Gemmatales; Gemmataceae; Gemmata59	eH2	2.67	0.0149
Bacteria; Planctomycetes; Planctomycea; Gemmatales; Gemmataceae; GemmataceaeFA1	aH2	0.52	0.0147
Bacteria; Planctomycetes; Planctomycea; Gemmatales; Gemmataceae; GemmataceaeFA110	aH2	1.93	0.0432
Bacteria; Planctomycetes; Planctomycea; Gemmatales; Gemmataceae; GemmataceaeFA113	aH2	1.93	0.0432
Bacteria; Planctomycetes; Planctomycea; Gemmatales; Gemmataceae; GemmataceaeFA119	aH2	4.11	0.0170
Bacteria; Planctomycetes; Planctomycea; Gemmatales; Gemmataceae; GemmataceaeFA125	aH2	4.11	0.0170
Bacteria; Planctomycetes; Planctomycea; Gemmatales; Gemmataceae; GemmataceaeFA127	aH2	4.11	0.0170
Bacteria; Planctomycetes; Planctomycea; Gemmatales; Gemmataceae; GemmataceaeFA133	aH2	4.42	0.0119
Bacteria; Planctomycetes; Planctomycea; Gemmatales; Gemmataceae; GemmataceaeFA153	aH2	3.73	0.0387
Bacteria; Planctomycetes; Planctomycea; Gemmatales; Gemmataceae; GemmataceaeFA155	aH2	3.73	0.0387
Bacteria; Planctomycetes; Planctomycea; Gemmatales; Gemmataceae; GemmataceaeFA16	aH2	0.84	0.0261
Bacteria; Planctomycetes; Planctomycea; Gemmatales; Gemmataceae; GemmataceaeFA161	eH2	4.06	0.0202
Bacteria; Planctomycetes; Planctomycea; Gemmatales; Gemmataceae; GemmataceaeFA168	aH2	5.07	0.0022
Bacteria; Planctomycetes; Planctomycea; Gemmatales; Gemmataceae; GemmataceaeFA169	aH2	3.73	0.0387
Bacteria; Planctomycetes; Planctomycea; Gemmatales; Gemmataceae; GemmataceaeFA175	aH2	3.73	0.0387
Bacteria; Planctomycetes; Planctomycea; Gemmatales; Gemmataceae; GemmataceaeFA177	aH2	3.73	0.0387
Bacteria; Planctomycetes; Planctomycea; Gemmatales; Gemmataceae; GemmataceaeFA178	aH2	4.11	0.0170
Bacteria; Planctomycetes; Planctomycea; Gemmatales; Gemmataceae; GemmataceaeFA188	aH2	4.42	0.0076
Bacteria; Planctomycetes; Planctomycea; Gemmatales; Gemmataceae; GemmataceaeFA19	eH2	1.03	0.0175
Bacteria; Planctomycetes; Planctomycea; Gemmatales; Gemmataceae; GemmataceaeFA2	aH2	0.56	0.0021
Bacteria; Planctomycetes; Planctomycea; Gemmatales; Gemmataceae; GemmataceaeFA213	aH2	4.11	0.0170
Bacteria; Planctomycetes; Planctomycea; Gemmatales; Gemmataceae; GemmataceaeFA215	aH2	4.11	0.0170
Bacteria; Planctomycetes; Planctomycea; Gemmatales; Gemmataceae; GemmataceaeFA219	aH2	4.11	0.0170
Bacteria; Planctomycetes; Planctomycea; Gemmatales; Gemmataceae; GemmataceaeFA222	aH2	4.11	0.0170
Bacteria; Planctomycetes; Planctomycea; Gemmatales; Gemmataceae; GemmataceaeFA227	aH2	3.73	0.0387
Bacteria; Planctomycetes; Planctomycea; Gemmatales; Gemmataceae; GemmataceaeFA229	aH2	4.42	0.0076
Bacteria; Planctomycetes; Planctomycea; Gemmatales; Gemmataceae; GemmataceaeFA237	aH2	4.11	0.0170
Bacteria; Planctomycetes; Planctomycea; Gemmatales; Gemmataceae; GemmataceaeFA238	aH2	4.11	0.0170
Bacteria; Planctomycetes; Planctomycea; Gemmatales; Gemmataceae; GemmataceaeFA251	eH2	4.06	0.0202
Bacteria; Planctomycetes; Planctomycea; Gemmatales; Gemmataceae; GemmataceaeFA254	aH2	3.73	0.0387
Bacteria; Planctomycetes; Planctomycea; Gemmatales; Gemmataceae; GemmataceaeFA255	aH2	3.73	0.0387
Bacteria; Planctomycetes; Planctomycea; Gemmatales; Gemmataceae; GemmataceaeFA268	eH2	4.06	0.0202
Bacteria; Planctomycetes; Planctomycea; Gemmatales; Gemmataceae; GemmataceaeFA279	aH2	4.11	0.0170
Bacteria; Planctomycetes; Planctomycea; Gemmatales; Gemmataceae; GemmataceaeFA3	aH2	0.41	0.0435
Bacteria; Planctomycetes; Planctomycea; Gemmatales; Gemmataceae; GemmataceaeFA304	eH2	4.06	0.0202
Bacteria; Planctomycetes; Planctomycea; Gemmatales; Gemmataceae; GemmataceaeFA35	eH2	1.24	0.0275
Bacteria; Planctomycetes; Planctomycea; Gemmatales; Gemmataceae; GemmataceaeFA381	eH2	4.06	0.0202
Bacteria; Planctomycetes; Planctomycea; Gemmatales; Gemmataceae; GemmataceaeFA407	aH2	3.73	0.0387
Bacteria; Planctomycetes; Planctomycea; Gemmatales; Gemmataceae; GemmataceaeFA43	eH2	1.06	0.0414
Bacteria; Planctomycetes; Planctomycea; Gemmatales; Gemmataceae; GemmataceaeFA45	aH2	1.80	0.0123
Bacteria; Planctomycetes; Planctomycea; Gemmatales; Gemmataceae; GemmataceaeFA50	aH2	2.09	0.0240
Bacteria; Planctomycetes; Planctomycea; Gemmatales; Gemmataceae; GemmataceaeFA66	aH2	1.75	0.0036
Bacteria; Planctomycetes; Planctomycea; Gemmatales; Gemmataceae; GemmataceaeFA68	aH2	1.58	0.0339
Bacteria; Planctomycetes; Planctomycea; Gemmatales; Isosphaeraceae; IsosphaeraceaeFA1	aH2	1.31	0.0000
Bacteria; Planctomycetes; Planctomycea; Gemmatales; Isosphaeraceae; IsosphaeraceaeFA15	aH2	4.42	0.0076
Bacteria; Planctomycetes; Planctomycea; Gemmatales; Isosphaeraceae; IsosphaeraceaeFA22	eH2	4.06	0.0202
Bacteria; Planctomycetes; Planctomycea; Gemmatales; Isosphaeraceae; IsosphaeraceaeFA24	eH2	4.06	0.0202
Bacteria; Planctomycetes; Planctomycea; Gemmatales; Isosphaeraceae; IsosphaeraceaeFA25	aH2	4.11	0.0170
Bacteria; Planctomycetes; Planctomycea; Gemmatales; Isosphaeraceae; IsosphaeraceaeFA26	eH2	4.06	0.0202
Bacteria; Planctomycetes; Planctomycea; Gemmatales; Isosphaeraceae; IsosphaeraceaeFA3	eH2	0.61	0.0252
Bacteria; Planctomycetes; Planctomycea; Pirellulales; Pirellulaceae; A1725	eH2	4.06	0.0202
Bacteria; Planctomycetes; Planctomycea; Pirellulales; Pirellulaceae; A1731	eH2	4.62	0.0045
Bacteria; Planctomycetes; Planctomycea; Pirellulales; Pirellulaceae; Pirellula1	eH2	0.83	0.0000
Bacteria; Planctomycetes; Planctomycea; Pirellulales; Pirellulaceae; Pirellula2	eH2	0.83	0.0114
Bacteria; Planctomycetes; Planctomycea; Pirellulales; Pirellulaceae; Pirellula5	eH2	1.91	0.0001
Bacteria; Planctomycetes; Planctomycea; Pirellulales; Pirellulaceae; PirellulaceaeFA14	eH2	4.06	0.0202
Bacteria; Planctomycetes; Planctomycea; Pirellulales; Pirellulaceae; PirellulaceaeFA16	aH2	3.73	0.0387
Bacteria; Planctomycetes; Planctomycea; Pirellulales; Pirellulaceae; PirellulaceaeFA6	aH2	4.67	0.0035
Bacteria; Planctomycetes; Planctomycea; Pirellulales; PirellulalesOR; PirellulalesOR11	aH2	4.11	0.0170
Bacteria; Planctomycetes; Planctomycea; Pirellulales; PirellulalesOR; PirellulalesOR15	aH2	4.11	0.0170
Bacteria; Planctomycetes; Planctomycea; Pirellulales; PirellulalesOR; PirellulalesOR2	aH2	0.52	0.0443
Bacteria; Planctomycetes; Planctomycea; Pirellulales; PirellulalesOR; PirellulalesOR22	aH2	3.73	0.0387
Bacteria; Planctomycetes; Planctomycea; Pirellulales; PirellulalesOR; PirellulalesOR7	aH2	5.07	0.0007
Bacteria; Planctomycetes; Planctomycea; Pirellulales1	aH2	0.71	0.0459
Bacteria; Planctomycetes; Planctomycea; Planctomycetales; Planctomycetaceae; Planctomyces11	eH2	3.24	0.0012
Bacteria; Planctomycetes; Planctomycea; Planctomycetales; Planctomycetaceae; Planctomyces15	eH2	4.06	0.0202
Bacteria; Planctomycetes; Planctomycea; Planctomycetales; Planctomycetaceae; Planctomyces21	aH2	3.73	0.0387
Bacteria; Planctomycetes; PW285; PW285CL; PW285CL; PW285CL3	eH2	2.14	0.0188
Bacteria; Planctomycetes; vadinHA49; vadinHA49CL; vadinHA49CL; vadinHA49CL1	eH2	0.73	0.0007
Bacteria; Planctomycetes; vadinHA49; vadinHA49CL; vadinHA49CL; vadinHA49CL27	eH2	4.06	0.0202
Bacteria; Planctomycetes; vadinHA49; vadinHA49CL; vadinHA49CL; vadinHA49CL4	eH2	1.49	0.0158
Bacteria; Planctomycetes; vadinHA49; vadinHA49CL; vadinHA49CL; vadinHA49CL7	aH2	4.89	0.0016
Bacteria; Planctomycetes1	eH2	0.80	0.0315
Bacteria; Proteobacteria; Alphaproteobacteria; AlphaproteobacteriaCL; AlphaproteobacteriaCL; AlphaproteobacteriaCL1	eH2	0.21	0.0022
Bacteria; Proteobacteria; Alphaproteobacteria; AlphaproteobacteriaCL; AlphaproteobacteriaCL; AlphaproteobacteriaCL102	eH2	4.06	0.0202
Bacteria; Proteobacteria; Alphaproteobacteria; AlphaproteobacteriaCL; AlphaproteobacteriaCL; AlphaproteobacteriaCL12	aH2	1.43	0.0004
Bacteria; Proteobacteria; Alphaproteobacteria; AlphaproteobacteriaCL; AlphaproteobacteriaCL; AlphaproteobacteriaCL14	aH2	0.90	0.0376
Bacteria; Proteobacteria; Alphaproteobacteria; AlphaproteobacteriaCL; AlphaproteobacteriaCL; AlphaproteobacteriaCL16	eH2	1.03	0.0006
Bacteria; Proteobacteria; Alphaproteobacteria; AlphaproteobacteriaCL; AlphaproteobacteriaCL; AlphaproteobacteriaCL18	aH2	2.38	0.0000
Bacteria; Proteobacteria; Alphaproteobacteria; AlphaproteobacteriaCL; AlphaproteobacteriaCL; AlphaproteobacteriaCL21	aH2	1.17	0.0242
Bacteria; Proteobacteria; Alphaproteobacteria; AlphaproteobacteriaCL; AlphaproteobacteriaCL; AlphaproteobacteriaCL22	eH2	2.61	0.0019
Bacteria; Proteobacteria; Alphaproteobacteria; AlphaproteobacteriaCL; AlphaproteobacteriaCL; AlphaproteobacteriaCL32	eH2	4.45	0.0000
Bacteria; Proteobacteria; Alphaproteobacteria; AlphaproteobacteriaCL; AlphaproteobacteriaCL; AlphaproteobacteriaCL33	eH2	2.61	0.0019
Bacteria; Proteobacteria; Alphaproteobacteria; AlphaproteobacteriaCL; AlphaproteobacteriaCL; AlphaproteobacteriaCL37	aH2	5.07	0.0007
Bacteria; Proteobacteria; Alphaproteobacteria; AlphaproteobacteriaCL; AlphaproteobacteriaCL; AlphaproteobacteriaCL4	eH2	0.33	0.0071
Bacteria; Proteobacteria; Alphaproteobacteria; AlphaproteobacteriaCL; AlphaproteobacteriaCL; AlphaproteobacteriaCL40	aH2	4.42	0.0076
Bacteria; Proteobacteria; Alphaproteobacteria; AlphaproteobacteriaCL; AlphaproteobacteriaCL; AlphaproteobacteriaCL43	aH2	1.93	0.0432
Bacteria; Proteobacteria; Alphaproteobacteria; AlphaproteobacteriaCL; AlphaproteobacteriaCL; AlphaproteobacteriaCL48	eH2	1.47	0.0488
Bacteria; Proteobacteria; Alphaproteobacteria; AlphaproteobacteriaCL; AlphaproteobacteriaCL; AlphaproteobacteriaCL5	aH2	0.54	0.0022
Bacteria; Proteobacteria; Alphaproteobacteria; AlphaproteobacteriaCL; AlphaproteobacteriaCL; AlphaproteobacteriaCL54	aH2	4.11	0.0170
Bacteria; Proteobacteria; Alphaproteobacteria; AlphaproteobacteriaCL; AlphaproteobacteriaCL; AlphaproteobacteriaCL59	eH2	1.86	0.0197
Bacteria; Proteobacteria; Alphaproteobacteria; AlphaproteobacteriaCL; AlphaproteobacteriaCL; AlphaproteobacteriaCL67	eH2	4.06	0.0202
Bacteria; Proteobacteria; Alphaproteobacteria; Caulobacterales; Caulobacteraceae; Asticcacaulis2	aH2	1.90	0.0080
Bacteria; Proteobacteria; Alphaproteobacteria; Caulobacterales; Caulobacteraceae; CaulobacteraceaeFA3	aH2	4.42	0.0076
Bacteria; Proteobacteria; Alphaproteobacteria; Caulobacterales; Caulobacteraceae; Phenylobacterium1	aH2	0.64	0.0162
Bacteria; Proteobacteria; Alphaproteobacteria; Kiloniellales; Kiloniellaceae; Kiloniella2	aH2	3.73	0.0387
Bacteria; Proteobacteria; Alphaproteobacteria; Kordiimonadales; Kordiimonadaceae; Kordiimonas1	eH2	4.06	0.0202
Bacteria; Proteobacteria; Alphaproteobacteria; Kordiimonadales; KordiimonadalesOR; KordiimonadalesOR1	aH2	2.23	0.0008
Bacteria; Proteobacteria; Alphaproteobacteria; Kordiimonadales; KordiimonadalesOR; KordiimonadalesOR4	eH2	4.06	0.0202
Bacteria; Proteobacteria; Alphaproteobacteria; Kordiimonadales; KordiimonadalesOR; KordiimonadalesOR5	aH2	3.73	0.0387
Bacteria; Proteobacteria; Alphaproteobacteria; Rhizobiales; Beijerinckiaceae; BeijerinckiaceaeFA1	aH2	0.57	0.0478
Bacteria; Proteobacteria; Alphaproteobacteria; Rhizobiales; Cohaesibacteraceae; CohaesibacteraceaeFA2	eH2	1.28	0.0321
Bacteria; Proteobacteria; Alphaproteobacteria; Rhizobiales; Cohaesibacteraceae; CohaesibacteraceaeFA9	eH2	2.14	0.0188
Bacteria; Proteobacteria; Alphaproteobacteria; Rhizobiales; Hyphomicrobiaceae; Devosia3	eH2	4.62	0.0045
Bacteria; Proteobacteria; Alphaproteobacteria; Rhizobiales; Hyphomicrobiaceae; Pedomicrobium4	aH2	3.73	0.0387
Bacteria; Proteobacteria; Alphaproteobacteria; Rhizobiales; RhizobialesOR; RhizobialesOR1	aH2	0.35	0.0007
Bacteria; Proteobacteria; Alphaproteobacteria; Rhizobiales; RhizobialesOR; RhizobialesOR14	aH2	4.67	0.0035
Bacteria; Proteobacteria; Alphaproteobacteria; Rhizobiales; RhizobialesOR; RhizobialesOR18	aH2	3.73	0.0387
Bacteria; Proteobacteria; Alphaproteobacteria; Rhizobiales; RhizobialesOR; RhizobialesOR9	aH2	2.90	0.0003
Bacteria; Proteobacteria; Alphaproteobacteria; Rhizobiales; Rhodobiaceae; RhodobiaceaeFA2	aH2	3.73	0.0387
Bacteria; Proteobacteria; Alphaproteobacteria; Rhodobacterales; Hyphomonadaceae; HyphomonadaceaeFA4	aH2	1.55	0.0043
Bacteria; Proteobacteria; Alphaproteobacteria; Rhodobacterales; Hyphomonadaceae; HyphomonadaceaeFA7	aH2	5.24	0.0003
Bacteria; Proteobacteria; Alphaproteobacteria; Rhodobacterales; Rhodobacteraceae; Paracoccus1	aH2	3.73	0.0387
Bacteria; Proteobacteria; Alphaproteobacteria; Rhodospirillales; Acetobacteraceae; AcetobacteraceaeFA2	aH2	0.80	0.0048
Bacteria; Proteobacteria; Alphaproteobacteria; Rhodospirillales; Acetobacteraceae; AcetobacteraceaeFA21	aH2	4.42	0.0076
Bacteria; Proteobacteria; Alphaproteobacteria; Rhodospirillales; Acetobacteraceae; AcetobacteraceaeFA3	aH2	0.76	0.0205
Bacteria; Proteobacteria; Alphaproteobacteria; Rhodospirillales; Rhodospirillaceae; Magnetospirillum3	aH2	3.73	0.0387
Bacteria; Proteobacteria; Alphaproteobacteria; Rhodospirillales; Rhodospirillaceae; RhodospirillaceaeFA107	eH2	4.06	0.0202
Bacteria; Proteobacteria; Alphaproteobacteria; Rhodospirillales; Rhodospirillaceae; RhodospirillaceaeFA108	aH2	3.73	0.0387
Bacteria; Proteobacteria; Alphaproteobacteria; Rhodospirillales; Rhodospirillaceae; RhodospirillaceaeFA11	aH2	0.89	0.0127
Bacteria; Proteobacteria; Alphaproteobacteria; Rhodospirillales; Rhodospirillaceae; RhodospirillaceaeFA114	aH2	3.73	0.0387
Bacteria; Proteobacteria; Alphaproteobacteria; Rhodospirillales; Rhodospirillaceae; RhodospirillaceaeFA117	eH2	4.06	0.0202
Bacteria; Proteobacteria; Alphaproteobacteria; Rhodospirillales; Rhodospirillaceae; RhodospirillaceaeFA153	eH2	4.06	0.0202
Bacteria; Proteobacteria; Alphaproteobacteria; Rhodospirillales; Rhodospirillaceae; RhodospirillaceaeFA2	aH2	0.52	0.0257
Bacteria; Proteobacteria; Alphaproteobacteria; Rhodospirillales; Rhodospirillaceae; RhodospirillaceaeFA28	aH2	2.23	0.0008
Bacteria; Proteobacteria; Alphaproteobacteria; Rhodospirillales; Rhodospirillaceae; RhodospirillaceaeFA3	aH2	0.38	0.0061
Bacteria; Proteobacteria; Alphaproteobacteria; Rhodospirillales; Rhodospirillaceae; RhodospirillaceaeFA31	eH2	1.74	0.0069
Bacteria; Proteobacteria; Alphaproteobacteria; Rhodospirillales; Rhodospirillaceae; RhodospirillaceaeFA35	aH2	1.28	0.0247
Bacteria; Proteobacteria; Alphaproteobacteria; Rhodospirillales; Rhodospirillaceae; RhodospirillaceaeFA39	aH2	2.37	0.0073
Bacteria; Proteobacteria; Alphaproteobacteria; Rhodospirillales; Rhodospirillaceae; RhodospirillaceaeFA47	aH2	2.37	0.0073
Bacteria; Proteobacteria; Alphaproteobacteria; Rhodospirillales; Rhodospirillaceae; RhodospirillaceaeFA5	aH2	0.86	0.0000
Bacteria; Proteobacteria; Alphaproteobacteria; Rhodospirillales; Rhodospirillaceae; RhodospirillaceaeFA51	aH2	2.61	0.0039
Bacteria; Proteobacteria; Alphaproteobacteria; Rhodospirillales; Rhodospirillaceae; RhodospirillaceaeFA57	aH2	5.23	0.0021
Bacteria; Proteobacteria; Alphaproteobacteria; Rhodospirillales; Rhodospirillaceae; RhodospirillaceaeFA67	aH2	4.89	0.0016
Bacteria; Proteobacteria; Alphaproteobacteria; Rhodospirillales; Rhodospirillaceae; RhodospirillaceaeFA72	eH2	2.14	0.0188
Bacteria; Proteobacteria; Alphaproteobacteria; Rhodospirillales; Rhodospirillaceae; RhodospirillaceaeFA81	aH2	4.11	0.0170
Bacteria; Proteobacteria; Alphaproteobacteria; Rhodospirillales; Rhodospirillaceae; RhodospirillaceaeFA94	aH2	4.11	0.0170
Bacteria; Proteobacteria; Alphaproteobacteria; Rhodospirillales; Rhodospirillaceae; RhodospirillaceaeFA96	aH2	3.73	0.0387
Bacteria; Proteobacteria; Alphaproteobacteria; Rickettsiales; Rickettsiaceae; RickettsiaceaeFA11	eH2	4.06	0.0202
Bacteria; Proteobacteria; Alphaproteobacteria; Rickettsiales; Rickettsiaceae; RickettsiaceaeFA3	aH2	3.73	0.0387
Bacteria; Proteobacteria; Alphaproteobacteria; Sphingomonadales; Erythrobacteraceae; Porphyrobacter1	eH2	4.62	0.0045
Bacteria; Proteobacteria; Alphaproteobacteria; Sphingomonadales; Sphingomonadaceae; Kaistobacter1	aH2	0.49	0.0000
Bacteria; Proteobacteria; Alphaproteobacteria; Sphingomonadales; Sphingomonadaceae; Kaistobacter2	aH2	0.87	0.0100
Bacteria; Proteobacteria; Alphaproteobacteria; Sphingomonadales; Sphingomonadaceae; SphingomonadaceaeFA1	aH2	0.96	0.0176
Bacteria; Proteobacteria; Alphaproteobacteria; Sphingomonadales; SphingomonadalesOR; SphingomonadalesOR1	aH2	2.16	0.0014
Bacteria; Proteobacteria; Alphaproteobacteria1	aH2	0.80	0.0013
Bacteria; Proteobacteria; Alphaproteobacteria2	eH2	6.46	0.0000
Bacteria; Proteobacteria; Alphaproteobacteria3	aH2	1.70	0.0308
Bacteria; Proteobacteria; Betaproteobacteria; BetaproteobacteriaCL; BetaproteobacteriaCL; BetaproteobacteriaCL1	aH2	0.30	0.0036
Bacteria; Proteobacteria; Betaproteobacteria; BetaproteobacteriaCL; BetaproteobacteriaCL; BetaproteobacteriaCL12	aH2	0.69	0.0229
Bacteria; Proteobacteria; Betaproteobacteria; BetaproteobacteriaCL; BetaproteobacteriaCL; BetaproteobacteriaCL14	eH2	0.82	0.0037
Bacteria; Proteobacteria; Betaproteobacteria; BetaproteobacteriaCL; BetaproteobacteriaCL; BetaproteobacteriaCL17	aH2	0.80	0.0092
Bacteria; Proteobacteria; Betaproteobacteria; BetaproteobacteriaCL; BetaproteobacteriaCL; BetaproteobacteriaCL19	aH2	1.21	0.0107
Bacteria; Proteobacteria; Betaproteobacteria; BetaproteobacteriaCL; BetaproteobacteriaCL; BetaproteobacteriaCL2	aH2	0.31	0.0084
Bacteria; Proteobacteria; Betaproteobacteria; BetaproteobacteriaCL; BetaproteobacteriaCL; BetaproteobacteriaCL23	aH2	1.69	0.0205
Bacteria; Proteobacteria; Betaproteobacteria; BetaproteobacteriaCL; BetaproteobacteriaCL; BetaproteobacteriaCL27	aH2	1.04	0.0292
Bacteria; Proteobacteria; Betaproteobacteria; BetaproteobacteriaCL; BetaproteobacteriaCL; BetaproteobacteriaCL3	aH2	0.60	0.0000
Bacteria; Proteobacteria; Betaproteobacteria; BetaproteobacteriaCL; BetaproteobacteriaCL; BetaproteobacteriaCL33	eH2	2.80	0.0006
Bacteria; Proteobacteria; Betaproteobacteria; BetaproteobacteriaCL; BetaproteobacteriaCL; BetaproteobacteriaCL36	aH2	1.69	0.0205
Bacteria; Proteobacteria; Betaproteobacteria; BetaproteobacteriaCL; BetaproteobacteriaCL; BetaproteobacteriaCL39	eH2	2.61	0.0019
Bacteria; Proteobacteria; Betaproteobacteria; BetaproteobacteriaCL; BetaproteobacteriaCL; BetaproteobacteriaCL42	eH2	1.86	0.0197
Bacteria; Proteobacteria; Betaproteobacteria; BetaproteobacteriaCL; BetaproteobacteriaCL; BetaproteobacteriaCL43	aH2	4.11	0.0170
Bacteria; Proteobacteria; Betaproteobacteria; BetaproteobacteriaCL; BetaproteobacteriaCL; BetaproteobacteriaCL5	aH2	0.87	0.0000
Bacteria; Proteobacteria; Betaproteobacteria; BetaproteobacteriaCL; BetaproteobacteriaCL; BetaproteobacteriaCL8	aH2	0.81	0.0000
Bacteria; Proteobacteria; Betaproteobacteria; Burkholderiales; Comamonadaceae; Comamonas1	aH2	1.19	0.0071
Bacteria; Proteobacteria; Betaproteobacteria; Burkholderiales; Comamonadaceae; Ramlibacter1	aH2	0.59	0.0000
Bacteria; Proteobacteria; Betaproteobacteria; Burkholderiales; Comamonadaceae; Xenophilus1	aH2	0.23	0.0130
Bacteria; Proteobacteria; Betaproteobacteria; Burkholderiales; Oxalobacteraceae; Massilia1	aH2	0.44	0.0000
Bacteria; Proteobacteria; Betaproteobacteria; Burkholderiales; Oxalobacteraceae; Massilia2	aH2	1.10	0.0000
Bacteria; Proteobacteria; Betaproteobacteria; Burkholderiales; Oxalobacteraceae; Oxalobacter4	eH2	4.06	0.0202
Bacteria; Proteobacteria; Betaproteobacteria; Burkholderiales; Oxalobacteraceae; OxalobacteraceaeFA1	aH2	0.42	0.0459
Bacteria; Proteobacteria; Betaproteobacteria; Burkholderiales; Oxalobacteraceae; OxalobacteraceaeFA7	eH2	4.62	0.0045
Bacteria; Proteobacteria; Betaproteobacteria; Burkholderiales; Oxalobacteraceae1	aH2	2.79	0.0000
Bacteria; Proteobacteria; Betaproteobacteria; Burkholderiales1	aH2	1.34	0.0373
Bacteria; Proteobacteria; Betaproteobacteria; Methylophilales; Methylophilaceae; MethylophilaceaeFA2	eH2	4.62	0.0045
Bacteria; Proteobacteria; Betaproteobacteria; Methylophilales; Methylophilaceae; Methylotenera1	aH2	0.61	0.0025
Bacteria; Proteobacteria; Betaproteobacteria; Neisseriales; Neisseriaceae; Chromobacterium1	eH2	2.80	0.0006
Bacteria; Proteobacteria; Betaproteobacteria; Nitrosomonadales; Nitrosomonadaceae; Nitrosomonas1	aH2	4.42	0.0076
Bacteria; Proteobacteria; Betaproteobacteria; Rhodocyclales; Rhodocyclaceae; Azonexus1	aH2	0.65	0.0008
Bacteria; Proteobacteria; Betaproteobacteria; Rhodocyclales; Rhodocyclaceae; Dechloromonas2	aH2	4.11	0.0170
Bacteria; Proteobacteria; Betaproteobacteria; Rhodocyclales; Rhodocyclaceae; Methyloversatilis1	eH2	0.46	0.0314
Bacteria; Proteobacteria; Betaproteobacteria; Rhodocyclales; RhodocyclalesOR; RhodocyclalesOR11	eH2	0.48	0.0002
Bacteria; Proteobacteria; Betaproteobacteria; Rhodocyclales; RhodocyclalesOR; RhodocyclalesOR15	eH2	0.34	0.0423
Bacteria; Proteobacteria; Betaproteobacteria; Rhodocyclales; RhodocyclalesOR; RhodocyclalesOR27	eH2	1.11	0.0089
Bacteria; Proteobacteria; Betaproteobacteria; Rhodocyclales; RhodocyclalesOR; RhodocyclalesOR33	eH2	2.22	0.0000
Bacteria; Proteobacteria; Betaproteobacteria; Rhodocyclales; RhodocyclalesOR; RhodocyclalesOR38	aH2	4.11	0.0170
Bacteria; Proteobacteria; Betaproteobacteria; Rhodocyclales; RhodocyclalesOR; RhodocyclalesOR40	aH2	5.23	0.0021
Bacteria; Proteobacteria; Betaproteobacteria; Rhodocyclales; RhodocyclalesOR; RhodocyclalesOR41	aH2	4.89	0.0016
Bacteria; Proteobacteria; Betaproteobacteria; Rhodocyclales; RhodocyclalesOR; RhodocyclalesOR42	aH2	4.11	0.0170
Bacteria; Proteobacteria; Betaproteobacteria; Rhodocyclales; RhodocyclalesOR; RhodocyclalesOR46	aH2	3.73	0.0387
Bacteria; Proteobacteria; Betaproteobacteria; Rhodocyclales; RhodocyclalesOR; RhodocyclalesOR7	aH2	0.39	0.0024
Bacteria; Proteobacteria; Deltaproteobacteria; Bdellovibrionales; Bdellovibrionaceae; Bdellovibrio16	aH2	4.67	0.0035
Bacteria; Proteobacteria; Deltaproteobacteria; Bdellovibrionales; Bdellovibrionaceae; Bdellovibrio18	eH2	2.67	0.0149
Bacteria; Proteobacteria; Deltaproteobacteria; Bdellovibrionales; Bdellovibrionaceae; Bdellovibrio20	aH2	4.89	0.0019
Bacteria; Proteobacteria; Deltaproteobacteria; Bdellovibrionales; Bdellovibrionaceae; Bdellovibrio25	eH2	2.67	0.0149
Bacteria; Proteobacteria; Deltaproteobacteria; Bdellovibrionales; Bdellovibrionaceae; Bdellovibrio30	aH2	4.11	0.0170
Bacteria; Proteobacteria; Deltaproteobacteria; Bdellovibrionales; Bdellovibrionaceae; Bdellovibrio31	aH2	3.73	0.0387
Bacteria; Proteobacteria; Deltaproteobacteria; Bdellovibrionales; Bdellovibrionaceae; Bdellovibrio39	aH2	4.42	0.0076
Bacteria; Proteobacteria; Deltaproteobacteria; Bdellovibrionales; Bdellovibrionaceae; Bdellovibrio43	eH2	4.06	0.0202
Bacteria; Proteobacteria; Deltaproteobacteria; Bdellovibrionales; Bdellovibrionaceae; Bdellovibrio51	eH2	4.06	0.0202
Bacteria; Proteobacteria; Deltaproteobacteria; Bdellovibrionales; Bdellovibrionaceae; BdellovibrionaceaeFA10	aH2	4.67	0.0035
Bacteria; Proteobacteria; Deltaproteobacteria; Bdellovibrionales; Bdellovibrionaceae; BdellovibrionaceaeFA14	aH2	4.11	0.0170
Bacteria; Proteobacteria; Deltaproteobacteria; Bdellovibrionales; Bdellovibrionaceae; BdellovibrionaceaeFA17	aH2	3.73	0.0387
Bacteria; Proteobacteria; Deltaproteobacteria; Bdellovibrionales; Bdellovibrionaceae; BdellovibrionaceaeFA2	aH2	2.09	0.0240
Bacteria; Proteobacteria; Deltaproteobacteria; Bdellovibrionales; Bdellovibrionaceae; BdellovibrionaceaeFA30	eH2	4.06	0.0202
Bacteria; Proteobacteria; Deltaproteobacteria; Bdellovibrionales; Bdellovibrionaceae; BdellovibrionaceaeFA6	aH2	4.11	0.0170
Bacteria; Proteobacteria; Deltaproteobacteria; CTD005-82B-02; CTD005-82B-02OR; CTD005-82B-02OR10	aH2	3.73	0.0387
Bacteria; Proteobacteria; Deltaproteobacteria; CTD005-82B-02; CTD005-82B-02OR; CTD005-82B-02OR12	eH2	2.14	0.0188
Bacteria; Proteobacteria; Deltaproteobacteria; CTD005-82B-02; CTD005-82B-02OR; CTD005-82B-02OR13	aH2	4.11	0.0170
Bacteria; Proteobacteria; Deltaproteobacteria; CTD005-82B-02; CTD005-82B-02OR; CTD005-82B-02OR18	aH2	3.73	0.0387
Bacteria; Proteobacteria; Deltaproteobacteria; CTD005-82B-02; CTD005-82B-02OR; CTD005-82B-02OR3	eH2	1.47	0.0488
Bacteria; Proteobacteria; Deltaproteobacteria; CTD005-82B-02; CTD005-82B-02OR; CTD005-82B-02OR4	aH2	4.42	0.0076
Bacteria; Proteobacteria; Deltaproteobacteria; DeltaproteobacteriaCL; DeltaproteobacteriaCL; DeltaproteobacteriaCL1	eH2	0.55	0.0120
Bacteria; Proteobacteria; Deltaproteobacteria; DeltaproteobacteriaCL; DeltaproteobacteriaCL; DeltaproteobacteriaCL10	eH2	2.99	0.0042
Bacteria; Proteobacteria; Deltaproteobacteria; DeltaproteobacteriaCL; DeltaproteobacteriaCL; DeltaproteobacteriaCL11	aH2	3.73	0.0387
Bacteria; Proteobacteria; Deltaproteobacteria; DeltaproteobacteriaCL; DeltaproteobacteriaCL; DeltaproteobacteriaCL17	aH2	3.73	0.0387
Bacteria; Proteobacteria; Deltaproteobacteria; DeltaproteobacteriaCL; DeltaproteobacteriaCL; DeltaproteobacteriaCL8	aH2	4.11	0.0170
Bacteria; Proteobacteria; Deltaproteobacteria; Desulfobacterales; Desulfobulbaceae; Desulfobulbus1	aH2	3.73	0.0387
Bacteria; Proteobacteria; Deltaproteobacteria; Desulfovibrionales; Desulfovibrionaceae; Desulfovibrio1	aH2	4.11	0.0170
Bacteria; Proteobacteria; Deltaproteobacteria; Desulfurellales; Desulfurellaceae; DesulfurellaceaeFA2	aH2	1.93	0.0432
Bacteria; Proteobacteria; Deltaproteobacteria; Desulfurellales; Desulfurellaceae; DesulfurellaceaeFA9	eH2	2.39	0.0060
Bacteria; Proteobacteria; Deltaproteobacteria; Desulfuromonadales; Geobacteraceae; Geobacter3	eH2	0.59	0.0000
Bacteria; Proteobacteria; Deltaproteobacteria; Desulfuromonadales; Geobacteraceae; Geobacter6	aH2	0.64	0.0213
Bacteria; Proteobacteria; Deltaproteobacteria; Desulfuromonadales; Geobacteraceae; Geobacter9	eH2	1.32	0.0373
Bacteria; Proteobacteria; Deltaproteobacteria; Desulfuromonadales; Geobacteraceae; GeobacteraceaeFA2	aH2	4.42	0.0076
Bacteria; Proteobacteria; Deltaproteobacteria; Entotheonellales; Entotheonellaceae; Candidatus Entotheonella3	eH2	1.24	0.0275
Bacteria; Proteobacteria; Deltaproteobacteria; MIZ46; MIZ46OR; MIZ46OR19	eH2	2.67	0.0149
Bacteria; Proteobacteria; Deltaproteobacteria; MIZ46; MIZ46OR; MIZ46OR25	eH2	2.14	0.0188
Bacteria; Proteobacteria; Deltaproteobacteria; MIZ46; MIZ46OR; MIZ46OR27	aH2	4.11	0.0170
Bacteria; Proteobacteria; Deltaproteobacteria; MIZ46; MIZ46OR; MIZ46OR33	aH2	4.67	0.0118
Bacteria; Proteobacteria; Deltaproteobacteria; MIZ46; MIZ46OR; MIZ46OR35	aH2	3.73	0.0387
Bacteria; Proteobacteria; Deltaproteobacteria; MIZ46; MIZ46OR; MIZ46OR36	aH2	3.73	0.0387
Bacteria; Proteobacteria; Deltaproteobacteria; MIZ46; MIZ46OR; MIZ46OR41	eH2	4.06	0.0202
Bacteria; Proteobacteria; Deltaproteobacteria; MIZ46; MIZ46OR; MIZ46OR50	eH2	2.99	0.0042
Bacteria; Proteobacteria; Deltaproteobacteria; MIZ46; MIZ46OR; MIZ46OR51	eH2	4.62	0.0045
Bacteria; Proteobacteria; Deltaproteobacteria; MIZ46; MIZ46OR; MIZ46OR73	eH2	5.59	0.0001
Bacteria; Proteobacteria; Deltaproteobacteria; Myxococcales; Cystobacteraceae; CystobacteraceaeFA11	eH2	4.06	0.0202
Bacteria; Proteobacteria; Deltaproteobacteria; Myxococcales; Haliangiaceae; HaliangiaceaeFA12	aH2	1.08	0.0064
Bacteria; Proteobacteria; Deltaproteobacteria; Myxococcales; Haliangiaceae; HaliangiaceaeFA122	eH2	4.62	0.0045
Bacteria; Proteobacteria; Deltaproteobacteria; Myxococcales; Haliangiaceae; HaliangiaceaeFA18	eH2	0.93	0.0235
Bacteria; Proteobacteria; Deltaproteobacteria; Myxococcales; Haliangiaceae; HaliangiaceaeFA3	aH2	0.42	0.0115
Bacteria; Proteobacteria; Deltaproteobacteria; Myxococcales; Haliangiaceae; HaliangiaceaeFA33	aH2	2.09	0.0240
Bacteria; Proteobacteria; Deltaproteobacteria; Myxococcales; Haliangiaceae; HaliangiaceaeFA39	eH2	2.67	0.0149
Bacteria; Proteobacteria; Deltaproteobacteria; Myxococcales; Haliangiaceae; HaliangiaceaeFA53	aH2	3.73	0.0387
Bacteria; Proteobacteria; Deltaproteobacteria; Myxococcales; Haliangiaceae; HaliangiaceaeFA56	eH2	2.67	0.0149
Bacteria; Proteobacteria; Deltaproteobacteria; Myxococcales; Haliangiaceae; HaliangiaceaeFA61	aH2	4.42	0.0129
Bacteria; Proteobacteria; Deltaproteobacteria; Myxococcales; Haliangiaceae; HaliangiaceaeFA62	aH2	5.52	0.0001
Bacteria; Proteobacteria; Deltaproteobacteria; Myxococcales; Haliangiaceae; HaliangiaceaeFA63	aH2	4.42	0.0076
Bacteria; Proteobacteria; Deltaproteobacteria; Myxococcales; Haliangiaceae; HaliangiaceaeFA69	eH2	2.67	0.0149
Bacteria; Proteobacteria; Deltaproteobacteria; Myxococcales; Haliangiaceae; HaliangiaceaeFA78	eH2	4.62	0.0045
Bacteria; Proteobacteria; Deltaproteobacteria; Myxococcales; Haliangiaceae; HaliangiaceaeFA8	eH2	0.63	0.0365
Bacteria; Proteobacteria; Deltaproteobacteria; Myxococcales; Haliangiaceae; HaliangiaceaeFA90	eH2	4.06	0.0202
Bacteria; Proteobacteria; Deltaproteobacteria; Myxococcales; Myxococcaceae; Anaeromyxobacter1	aH2	0.80	0.0390
Bacteria; Proteobacteria; Deltaproteobacteria; Myxococcales; Myxococcaceae; Anaeromyxobacter11	eH2	4.06	0.0202
Bacteria; Proteobacteria; Deltaproteobacteria; Myxococcales; Myxococcaceae; Anaeromyxobacter15	aH2	3.73	0.0387
Bacteria; Proteobacteria; Deltaproteobacteria; Myxococcales; Myxococcaceae; Anaeromyxobacter2	aH2	0.64	0.0494
Bacteria; Proteobacteria; Deltaproteobacteria; Myxococcales; Myxococcaceae; Myxococcus1	aH2	4.67	0.0035
Bacteria; Proteobacteria; Deltaproteobacteria; Myxococcales; MyxococcalesOR; MyxococcalesOR103	aH2	3.73	0.0387
Bacteria; Proteobacteria; Deltaproteobacteria; Myxococcales; MyxococcalesOR; MyxococcalesOR112	aH2	4.42	0.0076
Bacteria; Proteobacteria; Deltaproteobacteria; Myxococcales; MyxococcalesOR; MyxococcalesOR118	eH2	4.06	0.0202
Bacteria; Proteobacteria; Deltaproteobacteria; Myxococcales; MyxococcalesOR; MyxococcalesOR121	aH2	4.11	0.0170
Bacteria; Proteobacteria; Deltaproteobacteria; Myxococcales; MyxococcalesOR; MyxococcalesOR125	eH2	4.06	0.0202
Bacteria; Proteobacteria; Deltaproteobacteria; Myxococcales; MyxococcalesOR; MyxococcalesOR146	eH2	4.62	0.0045
Bacteria; Proteobacteria; Deltaproteobacteria; Myxococcales; MyxococcalesOR; MyxococcalesOR161	eH2	4.62	0.0045
Bacteria; Proteobacteria; Deltaproteobacteria; Myxococcales; MyxococcalesOR; MyxococcalesOR163	eH2	4.06	0.0202
Bacteria; Proteobacteria; Deltaproteobacteria; Myxococcales; MyxococcalesOR; MyxococcalesOR167	eH2	4.06	0.0202
Bacteria; Proteobacteria; Deltaproteobacteria; Myxococcales; MyxococcalesOR; MyxococcalesOR171	aH2	3.73	0.0387
Bacteria; Proteobacteria; Deltaproteobacteria; Myxococcales; MyxococcalesOR; MyxococcalesOR175	eH2	4.06	0.0202
Bacteria; Proteobacteria; Deltaproteobacteria; Myxococcales; MyxococcalesOR; MyxococcalesOR179	eH2	4.06	0.0202
Bacteria; Proteobacteria; Deltaproteobacteria; Myxococcales; MyxococcalesOR; MyxococcalesOR189	eH2	4.06	0.0202
Bacteria; Proteobacteria; Deltaproteobacteria; Myxococcales; MyxococcalesOR; MyxococcalesOR205	eH2	4.62	0.0045
Bacteria; Proteobacteria; Deltaproteobacteria; Myxococcales; MyxococcalesOR; MyxococcalesOR224	eH2	4.06	0.0202
Bacteria; Proteobacteria; Deltaproteobacteria; Myxococcales; MyxococcalesOR; MyxococcalesOR24	eH2	1.06	0.0414
Bacteria; Proteobacteria; Deltaproteobacteria; Myxococcales; MyxococcalesOR; MyxococcalesOR263	eH2	4.06	0.0202
Bacteria; Proteobacteria; Deltaproteobacteria; Myxococcales; MyxococcalesOR; MyxococcalesOR34	eH2	1.47	0.0488
Bacteria; Proteobacteria; Deltaproteobacteria; Myxococcales; MyxococcalesOR; MyxococcalesOR40	aH2	5.24	0.0003
Bacteria; Proteobacteria; Deltaproteobacteria; Myxococcales; MyxococcalesOR; MyxococcalesOR44	aH2	5.52	0.0001
Bacteria; Proteobacteria; Deltaproteobacteria; Myxococcales; MyxococcalesOR; MyxococcalesOR53	eH2	1.39	0.0430
Bacteria; Proteobacteria; Deltaproteobacteria; Myxococcales; MyxococcalesOR; MyxococcalesOR54	aH2	3.73	0.0387
Bacteria; Proteobacteria; Deltaproteobacteria; Myxococcales; MyxococcalesOR; MyxococcalesOR55	aH2	5.38	0.0003
Bacteria; Proteobacteria; Deltaproteobacteria; Myxococcales; MyxococcalesOR; MyxococcalesOR77	eH2	1.32	0.0373
Bacteria; Proteobacteria; Deltaproteobacteria; Myxococcales; MyxococcalesOR; MyxococcalesOR84	aH2	4.42	0.0119
Bacteria; Proteobacteria; Deltaproteobacteria; Myxococcales; MyxococcalesOR; MyxococcalesOR96	aH2	3.73	0.0387
Bacteria; Proteobacteria; Deltaproteobacteria; Myxococcales; MyxococcalesOR; MyxococcalesOR99	eH2	4.06	0.0202
Bacteria; Proteobacteria; Deltaproteobacteria; Myxococcales; Polyangiaceae; PolyangiaceaeFA1	aH2	1.14	0.0002
Bacteria; Proteobacteria; Deltaproteobacteria; Myxococcales; Polyangiaceae; PolyangiaceaeFA22	eH2	2.99	0.0042
Bacteria; Proteobacteria; Deltaproteobacteria; Myxococcales2	aH2	3.73	0.0387
Bacteria; Proteobacteria; Deltaproteobacteria; NB1-j; NB1-i; NB1-iFA2	aH2	6.06	0.0025
Bacteria; Proteobacteria; Deltaproteobacteria; Syntrophobacterales; Syntrophobacteraceae; Syntrophobacter2	aH2	4.11	0.0170
Bacteria; Proteobacteria; Deltaproteobacteria; Syntrophobacterales; Syntrophobacteraceae; SyntrophobacteraceaeFA14	aH2	1.02	0.0036
Bacteria; Proteobacteria; Deltaproteobacteria; Syntrophobacterales; Syntrophobacteraceae; SyntrophobacteraceaeFA20	aH2	1.52	0.0003
Bacteria; Proteobacteria; Deltaproteobacteria; Syntrophobacterales; Syntrophobacteraceae; SyntrophobacteraceaeFA26	aH2	1.43	0.0238
Bacteria; Proteobacteria; Deltaproteobacteria; Syntrophobacterales; Syntrophobacteraceae; SyntrophobacteraceaeFA28	aH2	1.14	0.0103
Bacteria; Proteobacteria; Deltaproteobacteria; Syntrophobacterales; Syntrophobacteraceae; SyntrophobacteraceaeFA3	eH2	0.43	0.0157
Bacteria; Proteobacteria; Deltaproteobacteria; Syntrophobacterales; Syntrophobacteraceae; SyntrophobacteraceaeFA30	aH2	2.50	0.0039
Bacteria; Proteobacteria; Deltaproteobacteria; Syntrophobacterales; Syntrophobacteraceae; SyntrophobacteraceaeFA31	aH2	1.90	0.0072
Bacteria; Proteobacteria; Deltaproteobacteria; Syntrophobacterales; Syntrophobacteraceae; SyntrophobacteraceaeFA41	aH2	4.42	0.0119
Bacteria; Proteobacteria; Deltaproteobacteria; Syntrophobacterales; Syntrophobacteraceae; SyntrophobacteraceaeFA42	eH2	4.06	0.0202
Bacteria; Proteobacteria; Deltaproteobacteria; Syntrophobacterales; Syntrophobacteraceae; SyntrophobacteraceaeFA44	eH2	4.06	0.0202
Bacteria; Proteobacteria; Deltaproteobacteria; Syntrophobacterales; Syntrophobacteraceae; SyntrophobacteraceaeFA73	eH2	4.06	0.0202
Bacteria; Proteobacteria; Deltaproteobacteria; Syntrophobacterales; Syntrophobacteraceae; SyntrophobacteraceaeFA9	aH2	0.79	0.0221
Bacteria; Proteobacteria; Deltaproteobacteria22	aH2	3.73	0.0387
Bacteria; Proteobacteria; Deltaproteobacteria8	aH2	3.73	0.0387
Bacteria; Proteobacteria; Gammaproteobacteria; Alteromonadales; Alteromonadaceae; Cellvibrio2	eH2	1.32	0.0373
Bacteria; Proteobacteria; Gammaproteobacteria; Alteromonadales; Alteromonadaceae; Cellvibrio3	aH2	4.11	0.0170
Bacteria; Proteobacteria; Gammaproteobacteria; Alteromonadales; Alteromonadaceae; Simidua1	aH2	4.11	0.0170
Bacteria; Proteobacteria; Gammaproteobacteria; Chromatiales; ChromatialesOR; ChromatialesOR10	eH2	4.62	0.0045
Bacteria; Proteobacteria; Gammaproteobacteria; Chromatiales; ChromatialesOR; ChromatialesOR3	aH2	5.07	0.0007
Bacteria; Proteobacteria; Gammaproteobacteria; Chromatiales; ChromatialesOR; ChromatialesOR9	eH2	4.06	0.0202
Bacteria; Proteobacteria; Gammaproteobacteria; Enterobacteriales; Enterobacteriaceae; Yersinia1	eH2	4.62	0.0045
Bacteria; Proteobacteria; Gammaproteobacteria; GammaproteobacteriaCL; GammaproteobacteriaCL; GammaproteobacteriaCL1	eH2	2.39	0.0060
Bacteria; Proteobacteria; Gammaproteobacteria; GammaproteobacteriaCL; GammaproteobacteriaCL; GammaproteobacteriaCL2	aH2	3.73	0.0387
Bacteria; Proteobacteria; Gammaproteobacteria; Legionellales; Coxiellaceae; Aquicella10	aH2	4.11	0.0170
Bacteria; Proteobacteria; Gammaproteobacteria; Legionellales; Coxiellaceae; Aquicella23	aH2	3.73	0.0387
Bacteria; Proteobacteria; Gammaproteobacteria; Legionellales; Coxiellaceae; Aquicella26	eH2	4.06	0.0202
Bacteria; Proteobacteria; Gammaproteobacteria; Legionellales; Coxiellaceae; Aquicella42	eH2	4.06	0.0202
Bacteria; Proteobacteria; Gammaproteobacteria; Legionellales; Coxiellaceae; Aquicella5	aH2	3.73	0.0387
Bacteria; Proteobacteria; Gammaproteobacteria; Legionellales; Coxiellaceae; CoxiellaceaeFA104	eH2	4.06	0.0202
Bacteria; Proteobacteria; Gammaproteobacteria; Legionellales; Coxiellaceae; CoxiellaceaeFA15	aH2	4.42	0.0129
Bacteria; Proteobacteria; Gammaproteobacteria; Legionellales; Coxiellaceae; CoxiellaceaeFA19	aH2	4.11	0.0170
Bacteria; Proteobacteria; Gammaproteobacteria; Legionellales; Coxiellaceae; CoxiellaceaeFA191	eH2	4.06	0.0202
Bacteria; Proteobacteria; Gammaproteobacteria; Legionellales; Coxiellaceae; CoxiellaceaeFA22	aH2	3.73	0.0387
Bacteria; Proteobacteria; Gammaproteobacteria; Legionellales; Coxiellaceae; CoxiellaceaeFA32	eH2	4.06	0.0202
Bacteria; Proteobacteria; Gammaproteobacteria; Legionellales; Coxiellaceae; CoxiellaceaeFA36	eH2	4.06	0.0202
Bacteria; Proteobacteria; Gammaproteobacteria; Legionellales; Coxiellaceae; CoxiellaceaeFA40	aH2	3.73	0.0387
Bacteria; Proteobacteria; Gammaproteobacteria; Legionellales; Coxiellaceae; CoxiellaceaeFA53	aH2	3.73	0.0387
Bacteria; Proteobacteria; Gammaproteobacteria; Legionellales; Coxiellaceae; CoxiellaceaeFA71	eH2	4.06	0.0202
Bacteria; Proteobacteria; Gammaproteobacteria; Legionellales; Coxiellaceae; CoxiellaceaeFA86	aH2	3.73	0.0387
Bacteria; Proteobacteria; Gammaproteobacteria; Legionellales; Coxiellaceae; CoxiellaceaeFA98	eH2	4.06	0.0202
Bacteria; Proteobacteria; Gammaproteobacteria; Legionellales; Legionellaceae; Legionella9	eH2	4.06	0.0202
Bacteria; Proteobacteria; Gammaproteobacteria; Legionellales; Legionellaceae; Tatlockia1	eH2	4.06	0.0202
Bacteria; Proteobacteria; Gammaproteobacteria; Legionellales; LegionellalesOR; LegionellalesOR1	eH2	4.06	0.0202
Bacteria; Proteobacteria; Gammaproteobacteria; Oceanospirillales; 211ds20; 211ds20FA1	eH2	1.06	0.0414
Bacteria; Proteobacteria; Gammaproteobacteria; Oceanospirillales; 211ds20; 211ds20FA2	eH2	5.02	0.0010
Bacteria; Proteobacteria; Gammaproteobacteria; Oceanospirillales; Litincolaceae; LitincolaceaeFA7	eH2	4.06	0.0202
Bacteria; Proteobacteria; Gammaproteobacteria; Pseudomonadales; Moraxellaceae; Acinetobacter1	aH2	2.61	0.0021
Bacteria; Proteobacteria; Gammaproteobacteria; Pseudomonadales; Moraxellaceae; Alkanindiges1	aH2	0.86	0.0013
Bacteria; Proteobacteria; Gammaproteobacteria; Salinisphaerales; Salinisphaeraceae; SalinisphaeraceaeFA1	aH2	3.73	0.0387
Bacteria; Proteobacteria; Gammaproteobacteria; Thiotrichales; ThiotrichalesOR; ThiotrichalesOR15	eH2	4.62	0.0045
Bacteria; Proteobacteria; Gammaproteobacteria; Thiotrichales; ThiotrichalesOR; ThiotrichalesOR16	aH2	4.11	0.0170
Bacteria; Proteobacteria; Gammaproteobacteria; Thiotrichales; ThiotrichalesOR; ThiotrichalesOR4	aH2	4.11	0.0170
Bacteria; Proteobacteria; Gammaproteobacteria; Thiotrichales; ThiotrichalesOR; ThiotrichalesOR6	aH2	4.89	0.0019
Bacteria; Proteobacteria; Gammaproteobacteria; Xanthomonadales; Sinobacteraceae; SinobacteraceaeFA1	aH2	0.85	0.0000
Bacteria; Proteobacteria; Gammaproteobacteria; Xanthomonadales; Sinobacteraceae; SinobacteraceaeFA11	aH2	0.76	0.0463
Bacteria; Proteobacteria; Gammaproteobacteria; Xanthomonadales; Sinobacteraceae; SinobacteraceaeFA12	aH2	1.35	0.0162
Bacteria; Proteobacteria; Gammaproteobacteria; Xanthomonadales; Sinobacteraceae; SinobacteraceaeFA15	eH2	1.14	0.0123
Bacteria; Proteobacteria; Gammaproteobacteria; Xanthomonadales; Sinobacteraceae; SinobacteraceaeFA8	aH2	1.99	0.0000
Bacteria; Proteobacteria; Gammaproteobacteria; Xanthomonadales; Xanthomonadaceae; Dokdonella1	aH2	0.49	0.0497
Bacteria; Proteobacteria; Gammaproteobacteria; Xanthomonadales; Xanthomonadaceae; Dokdonella4	aH2	4.42	0.0076
Bacteria; Proteobacteria; Gammaproteobacteria; Xanthomonadales; Xanthomonadaceae; Dyella1	aH2	1.36	0.0072
Bacteria; Proteobacteria; Gammaproteobacteria; Xanthomonadales; Xanthomonadaceae; Dyella2	aH2	4.67	0.0035
Bacteria; Proteobacteria; Gammaproteobacteria; Xanthomonadales; Xanthomonadaceae; Luteimonas1	aH2	1.21	0.0013
Bacteria; Proteobacteria; Gammaproteobacteria; Xanthomonadales; Xanthomonadaceae; Lysobacter1	aH2	0.88	0.0334
Bacteria; Proteobacteria; Gammaproteobacteria; Xanthomonadales; Xanthomonadaceae; Rhodanobacter1	aH2	6.43	0.0000
Bacteria; Proteobacteria; Gammaproteobacteria; Xanthomonadales; Xanthomonadaceae; XanthomonadaceaeFA1	aH2	0.65	0.0000
Bacteria; Proteobacteria; Gammaproteobacteria; Xanthomonadales; Xanthomonadaceae; XanthomonadaceaeFA15	aH2	4.11	0.0170
Bacteria; Proteobacteria; Gammaproteobacteria; Xanthomonadales; Xanthomonadaceae; XanthomonadaceaeFA2	aH2	0.42	0.0010
Bacteria; Proteobacteria; Gammaproteobacteria; Xanthomonadales; Xanthomonadaceae; XanthomonadaceaeFA3	aH2	0.31	0.0100
Bacteria; Proteobacteria; Gammaproteobacteria; Xanthomonadales; Xanthomonadaceae; XanthomonadaceaeFA4	aH2	0.77	0.0000
Bacteria; Proteobacteria; Gammaproteobacteria; Xanthomonadales; Xanthomonadaceae; XanthomonadaceaeFA5	eH2	0.77	0.0102
Bacteria; Proteobacteria; Gammaproteobacteria; Xanthomonadales; XanthomonadalesOR; XanthomonadalesOR1	aH2	0.67	0.0035
Bacteria; Proteobacteria; Gammaproteobacteria; Xanthomonadales; XanthomonadalesOR; XanthomonadalesOR13	aH2	4.11	0.0170
Bacteria; Proteobacteria; Gammaproteobacteria1	aH2	1.12	0.0142
Bacteria; Proteobacteria11	aH2	2.09	0.0240
Bacteria; Proteobacteria15	aH2	4.11	0.0170
Bacteria; Proteobacteria17	aH2	4.11	0.0170
Bacteria; Proteobacteria18	aH2	4.11	0.0170
Bacteria; Proteobacteria25	aH2	3.73	0.0387
Bacteria; Proteobacteria28	aH2	3.73	0.0387
Bacteria; Proteobacteria3	eH2	1.08	0.0494
Bacteria; Proteobacteria4	eH2	1.14	0.0123
Bacteria; Proteobacteria48	eH2	4.06	0.0202
Bacteria; SC3; SC3PH; SC3PH; SC3PH; SC3PH2	aH2	1.58	0.0339
Bacteria; SPAM; 0319-6G9; 0319-6G9CL; 0319-6G9CL; 0319-6G9CL8	eH2	4.06	0.0202
Bacteria; SPAM; 0319-6G9; 0319-6G9CL; 0319-6G9CL; 0319-6G9CL9	aH2	3.73	0.0387
Bacteria; SPAM; FFCH6980; FFCH6980CL; FFCH6980CL; FFCH6980CL5	eH2	4.06	0.0202
Bacteria; Spirochaetes; Spirochaetes (class); Spirochaetales; Spirochaetaceae; Spirochaeta1	eH2	1.64	0.0065
Bacteria; Spirochaetes; Spirochaetes (class); Spirochaetales; Spirochaetaceae; Treponema2	aH2	3.73	0.0387
Bacteria; Tenericutes; Mollicutes; Mycoplasmatales; Mycoplasmataceae; MycoplasmataceaeFA2	eH2	4.06	0.0202
Bacteria; Tenericutes; TenericutesPH; TenericutesPH; TenericutesPH; TenericutesPH2	aH2	3.73	0.0387
Bacteria; Thermotogae; Thermotogae (class); Thermotogales; ThermotogalesOR; ThermotogalesOR1	eH2	1.02	0.0148
Bacteria; TM6; SBRH58; SBRH58CL; SBRH58CL; SBRH58CL2	eH2	2.67	0.0149
Bacteria; TM6; SBRH58; SBRH58CL; SBRH58CL; SBRH58CL4	eH2	1.86	0.0197
Bacteria; TM6; SBRH58; SBRH58CL; SBRH58CL; SBRH58CL8	eH2	4.06	0.0202
Bacteria; TM6; SJA-4; SJA-4CL; SJA-4CL; SJA-4CL109	aH2	3.73	0.0387
Bacteria; TM6; SJA-4; SJA-4CL; SJA-4CL; SJA-4CL17	aH2	4.11	0.0170
Bacteria; TM6; SJA-4; SJA-4CL; SJA-4CL; SJA-4CL19	eH2	4.95	0.0000
Bacteria; TM6; SJA-4; SJA-4CL; SJA-4CL; SJA-4CL26	aH2	4.11	0.0170
Bacteria; TM6; SJA-4; SJA-4CL; SJA-4CL; SJA-4CL32	aH2	4.11	0.0170
Bacteria; TM6; SJA-4; SJA-4CL; SJA-4CL; SJA-4CL34	aH2	3.73	0.0387
Bacteria; TM6; SJA-4; SJA-4CL; SJA-4CL; SJA-4CL43	eH2	4.06	0.0202
Bacteria; TM6; SJA-4; SJA-4CL; SJA-4CL; SJA-4CL49	eH2	4.06	0.0202
Bacteria; TM6; SJA-4; SJA-4CL; SJA-4CL; SJA-4CL9	aH2	3.73	0.0387
Bacteria; TM7; TM7-1; TM7-1CL; TM7-1CL; TM7-1CL14	eH2	5.02	0.0010
Bacteria; Verrucomicrobia; Opitutae; OpitutaeCL; OpitutaeCL; OpitutaeCL2	aH2	1.43	0.0238
Bacteria; Verrucomicrobia; Opitutae; OpitutaeCL; OpitutaeCL; OpitutaeCL5	eH2	4.62	0.0045
Bacteria; Verrucomicrobia; Opitutae; Opitutales; Opitutaceae; OpitutaceaeFA1	eH2	0.29	0.0395
Bacteria; Verrucomicrobia; Opitutae; Opitutales; Opitutaceae; OpitutaceaeFA11	eH2	4.62	0.0045
Bacteria; Verrucomicrobia; Opitutae; Opitutales; Opitutaceae; OpitutaceaeFA2	eH2	0.54	0.0408
Bacteria; Verrucomicrobia; Opitutae; Opitutales; Opitutaceae; Opitutus1	eH2	0.55	0.0060
Bacteria; Verrucomicrobia; Spartobacteria; Spartobacteriales; Spartobacteriaceae; Chthoniobacter1	aH2	0.99	0.0301
Bacteria; Verrucomicrobia; Spartobacteria; Spartobacteriales; Spartobacteriaceae; Chthoniobacter16	aH2	4.42	0.0129
Bacteria; Verrucomicrobia; Spartobacteria; Spartobacteriales; Spartobacteriaceae; Chthoniobacter17	aH2	4.42	0.0076
Bacteria; Verrucomicrobia; Spartobacteria; Spartobacteriales; Spartobacteriaceae; Chthoniobacter23	aH2	4.67	0.0035
Bacteria; Verrucomicrobia; Spartobacteria; Spartobacteriales; Spartobacteriaceae; Chthoniobacter32	aH2	4.11	0.0170
Bacteria; Verrucomicrobia; Spartobacteria; Spartobacteriales; Spartobacteriaceae; MC181	aH2	0.14	0.0303
Bacteria; Verrucomicrobia; Spartobacteria; Spartobacteriales; Spartobacteriaceae; MC1811	aH2	0.87	0.0193
Bacteria; Verrucomicrobia; Spartobacteria; Spartobacteriales; Spartobacteriaceae; MC1820	aH2	1.43	0.0424
Bacteria; Verrucomicrobia; Spartobacteria; Spartobacteriales; Spartobacteriaceae; MC1825	eH2	4.06	0.0202
Bacteria; Verrucomicrobia; Spartobacteria; Spartobacteriales; Spartobacteriaceae; MC183	aH2	0.31	0.0313
Bacteria; Verrucomicrobia; Spartobacteria; Spartobacteriales; Spartobacteriaceae; MC184	aH2	0.32	0.0461
Bacteria; Verrucomicrobia; Spartobacteria; Spartobacteriales; Spartobacteriaceae; MC186	eH2	0.54	0.0011
Bacteria; Verrucomicrobia; Spartobacteria; Spartobacteriales; Spartobacteriaceae; MC187	aH2	0.72	0.0003
Bacteria; Verrucomicrobia; Spartobacteria; Spartobacteriales; Spartobacteriaceae; MC188	aH2	0.90	0.0084
Bacteria; Verrucomicrobia; Verrucomicrobiae; Verrucomicrobiales; Verrucomicrobia subdivision 3; Verrucomicrobia subdivision 3FA1	eH2	0.38	0.0000
Bacteria; Verrucomicrobia; Verrucomicrobiae; Verrucomicrobiales; Verrucomicrobia subdivision 3; Verrucomicrobia subdivision 3FA11	eH2	0.93	0.0235
Bacteria; Verrucomicrobia; Verrucomicrobiae; Verrucomicrobiales; Verrucomicrobia subdivision 3; Verrucomicrobia subdivision 3FA15	aH2	1.04	0.0329
Bacteria; Verrucomicrobia; Verrucomicrobiae; Verrucomicrobiales; Verrucomicrobia subdivision 3; Verrucomicrobia subdivision 3FA2	eH2	0.37	0.0203
Bacteria; Verrucomicrobia; Verrucomicrobiae; Verrucomicrobiales; Verrucomicrobia subdivision 3; Verrucomicrobia subdivision 3FA21	aH2	4.11	0.0170
Bacteria; Verrucomicrobia; Verrucomicrobiae; Verrucomicrobiales; Verrucomicrobia subdivision 3; Verrucomicrobia subdivision 3FA7	eH2	0.66	0.0227
Bacteria; Verrucomicrobia; Verrucomicrobiae; Verrucomicrobiales; Verrucomicrobia subdivision 3; Verrucomicrobia subdivision 3FA9	eH2	0.82	0.0189
Bacteria; Verrucomicrobia; Verrucomicrobiae; Verrucomicrobiales; VerrucomicrobialesOR; VerrucomicrobialesOR1	eH2	0.27	0.0030
Bacteria; Verrucomicrobia; Verrucomicrobiae; Verrucomicrobiales; VerrucomicrobialesOR; VerrucomicrobialesOR11	eH2	0.48	0.0147
Bacteria; Verrucomicrobia; Verrucomicrobiae; Verrucomicrobiales; VerrucomicrobialesOR; VerrucomicrobialesOR17	aH2	0.82	0.0022
Bacteria; Verrucomicrobia; Verrucomicrobiae; Verrucomicrobiales; VerrucomicrobialesOR; VerrucomicrobialesOR18	eH2	0.88	0.0091
Bacteria; Verrucomicrobia; Verrucomicrobiae; Verrucomicrobiales; VerrucomicrobialesOR; VerrucomicrobialesOR28	eH2	1.52	0.0001
Bacteria; Verrucomicrobia; Verrucomicrobiae; Verrucomicrobiales; VerrucomicrobialesOR; VerrucomicrobialesOR33	eH2	1.31	0.0002
Bacteria; Verrucomicrobia; Verrucomicrobiae; Verrucomicrobiales; VerrucomicrobialesOR; VerrucomicrobialesOR39	aH2	2.72	0.0011
Bacteria; Verrucomicrobia; Verrucomicrobiae; Verrucomicrobiales; VerrucomicrobialesOR; VerrucomicrobialesOR43	eH2	1.37	0.0037
Bacteria; Verrucomicrobia; Verrucomicrobiae; Verrucomicrobiales; VerrucomicrobialesOR; VerrucomicrobialesOR45	eH2	1.39	0.0430
Bacteria; Verrucomicrobia; Verrucomicrobiae; Verrucomicrobiales; VerrucomicrobialesOR; VerrucomicrobialesOR57	eH2	1.32	0.0373
Bacteria; Verrucomicrobia; Verrucomicrobiae; Verrucomicrobiales; VerrucomicrobialesOR; VerrucomicrobialesOR61	eH2	2.14	0.0188
Bacteria; Verrucomicrobia; Verrucomicrobiae; Verrucomicrobiales; VerrucomicrobialesOR; VerrucomicrobialesOR67	aH2	4.42	0.0076
Bacteria; Verrucomicrobia; Verrucomicrobiae; Verrucomicrobiales; VerrucomicrobialesOR; VerrucomicrobialesOR71	eH2	3.24	0.0012
Bacteria; Verrucomicrobia; Verrucomicrobiae; Verrucomicrobiales; VerrucomicrobialesOR; VerrucomicrobialesOR83	eH2	4.06	0.0202
Bacteria; Verrucomicrobia; Verrucomicrobiae; Verrucomicrobiales; VerrucomicrobialesOR; VerrucomicrobialesOR90	eH2	2.99	0.0042
Bacteria; Verrucomicrobia; VerrucomicrobiaPH; VerrucomicrobiaPH; VerrucomicrobiaPH; VerrucomicrobiaPH11	eH2	4.62	0.0045
Bacteria; Verrucomicrobia; VerrucomicrobiaPH; VerrucomicrobiaPH; VerrucomicrobiaPH; VerrucomicrobiaPH6	aH2	3.73	0.0387
Bacteria; WPS-2; WPS-2PH; WPS-2PH; WPS-2PH; WPS-2PH1	aH2	5.40	0.0100
Bacteria; WPS-2; WPS-2PH; WPS-2PH; WPS-2PH; WPS-2PH12	eH2	4.06	0.0202
Bacteria; WPS-2; WPS-2PH; WPS-2PH; WPS-2PH; WPS-2PH3	aH2	4.42	0.0076
Bacteria; WS3; PRR-12; LD1-PA13; LD1-PA13OR; LD1-PA13OR2	aH2	4.42	0.0076
Bacteria; WS3; PRR-12; LD1-PA13; LD1-PA13OR; LD1-PA13OR3	eH2	1.74	0.0069
Bacteria; WS3; PRR-12; Sediment-1; PRR-10; PRR-10FA1	eH2	0.35	0.0076
Bacteria; WS3; PRR-12; Sediment-1; PRR-10; PRR-10FA30	eH2	4.62	0.0045
Bacteria; WS3; PRR-12; Sediment-1; Sediment-1OR; Sediment-1OR2	aH2	0.59	0.0334
Bacteria; WS3; PRR-12; Sediment-1; Sediment-1OR; Sediment-1OR3	aH2	1.90	0.0072
Bacteria; WS3; PRR-12; wb1_H11; wb1_H11OR; wb1_H11OR1	aH2	1.04	0.0329
Bacteria; WS3; PRR-12; wb1_H11; wb1_H11OR; wb1_H11OR2	aH2	4.42	0.0129
Bacteria; WS3; PRR-12; wb1_H11; wb1_H11OR; wb1_H11OR3	aH2	3.73	0.0387
Bacteria; WS6; SC72; SC72CL; SC72CL; SC72CL21	aH2	3.73	0.0387
Bacteria; ZB2; ZB2PH; ZB2PH; ZB2PH; ZB2PH18	aH2	4.11	0.0170
Bacteria; ZB2; ZB2PH; ZB2PH; ZB2PH; ZB2PH68	eH2	2.67	0.0149
Bacteria; ZB3; ZB3PH; ZB3PH; ZB3PH; ZB3PH3	eH2	4.06	0.0202
Bacteria100	aH2	3.73	0.0387
Bacteria138	eH2	4.06	0.0202
Bacteria149	eH2	4.06	0.0202
Bacteria163	aH2	3.73	0.0387
Bacteria17	aH2	1.80	0.0123
Bacteria179	eH2	4.06	0.0202
Bacteria187	eH2	4.06	0.0202
Bacteria236	eH2	4.06	0.0202
Bacteria244	eH2	4.06	0.0202
Bacteria257	eH2	4.06	0.0202
Bacteria27	aH2	5.07	0.0007
Bacteria28	aH2	4.89	0.0016
Bacteria30	eH2	1.28	0.0321
Bacteria32	aH2	2.72	0.0011
Bacteria345	eH2	4.06	0.0202
Bacteria37	aH2	5.07	0.0007
Bacteria38	aH2	4.11	0.0170
Bacteria42	eH2	5.02	0.0010
Bacteria49	aH2	5.24	0.0003
Bacteria53	aH2	4.11	0.0170
Bacteria56	aH2	4.42	0.0076
Bacteria57	aH2	3.73	0.0387
Bacteria6	eH2	0.47	0.0142
Bacteria60	aH2	4.11	0.0170
Bacteria71	eH2	4.06	0.0202
Bacteria75	eH2	4.06	0.0202
Bacteria78	aH2	4.42	0.0129
Bacteria85	aH2	3.73	0.0387
Bacteria87	eH2	2.99	0.0042

## Sheet: qPCR
hhyL
Days	eH2(a)	eH2(b)	aH2(a)	aH2(b)
0	3.54305e+07	3.35357e+07	4.23193e+07	2.91128e+07
1	3.32669e+07	2.71258e+07	3.48887e+07	3.03611e+07
3	2.50861e+07	2.58639e+07	2.92181e+07	2.25032e+07
5	2.55497e+07	1.96675e+07	2.70576e+07	2.38452e+07
7	2.53245e+07	2.61387e+07	3.10425e+07	2.74645e+07
10	2.37101e+07	2.46341e+07	2.58724e+07	2.39015e+07
16S rRNA
Days	eH2(a)	eH2(b)	aH2(a)	aH2(b)
0	20824097000	20320149800	19749871200	19042197000
1	19424917800	17993470000	21220419000	18821049700
3	19623987300	20120419800	20124124000	20321049873
5	2.11184e+10	23347904000	19634524000	22412894700
7	19832507000	18941235000	2.25192e+10	2.08877e+10
10	20732598700	19824310000	19924135000	21124000000

## Sheet: Kinetic parameters
eH2
H2 Concentration (ppmv)	Uptake 1	Uptake 2	Uptake 3	(nmol g(dw)-1 h-1)
5000	683.105	707.434	533.646
1000	436.025	505.141	367.448
500	181.907	334.221	265.992
50	30.1159	35.6647	31.7874
20	24.1501	23.0573	21.5216
5	5.1556	5.3802	5.0845
10-day incubation with 500ppmv H2 (eH2)
aH2
H2 Concentration (ppmv)	Uptake 1	Uptake 2	Uptake 3	(nmol g(dw)-1 h-1)
5000	45.8257	49.6051	48.8586
1000	40.0268	46.8988	47.5308
500	39.3347	40.1376	38.7885
50	21.1242	22.8917	23.724
20	18.2038	18.0133	18.5917
5	6.3703	7.1966	7.7361
10-day incubation with 0.5ppmv H2 (aH2)

## Sheet: H2Oxidation rate per dry weight
Soil dry weight (g)	H2 oxidation rate (nmol g(dw)-1 h-1)
150	1.11212
200	1.41059
250	1.67799

## Sheet: Physicochemical properties
Microcosms	pH	Carbon (%)	Nitrogen (%)	Water Content (%)	H2 uptake nmol g(dw)-1 h-1
0eH2(a)	5.67	3.41	0.29	0.35	3.6232
0eH2(b)	5.78	3.47	0.29	0.34	3.35036
0aH2(a)	5.94	3.61	0.31	0.34	2.9372
0aH2(b)	6.01	3.65	0.3	0.34	2.82211
1eH2(a)	5.40	2.91	0.25	0.30	1.20183
1eH2(b)	5.63	2.70	0.23	0.29	1.24781
1aH2(a)	5.81	3.20	0.27	0.30	2.4149
1aH2(b)	6.68	2.86	0.24	0.28	2.28761
3eH2(a)	4.91	3.38	0.28	0.25	0.524984
3eH2(b)	5.01	2.97	0.25	0.24	0.582551
3aH2(a)	5.04	2.93	0.24	0.27	2.63174
3aH2(b)	5.07	2.83	0.24	0.23	2.37376
5eH2(a)	4.83	3.02	0.25	0.25	0.341921
5eH2(b)	4.82	3.03	0.25	0.24	0.337235
5aH2(a)	4.86	3.00	0.25	0.27	2.46918
5aH2(b)	4.93	2.87	0.24	0.23	2.40718
7eH2(a)	4.93	2.76	0.23	0.25	0.320797
7eH2(b)	4.95	2.87	0.24	0.24	0.316295
7aH2(a)	4.98	3.03	0.25	0.27	2.71221
7aH2(b)	5.02	3.16	0.26	0.23	5.49284
10eH2(a)	5.00	2.87	0.24	0.19	0.394248
10eH2(b)	5.07	3.10	0.26	0.12	0.24951
10aH2(a)	5.04	3.12	0.26	0.23	7.50861
10aH2(b)	5.13	3.18	0.26	0.21	4.87204
